# 1 Can good broiler flock welfare prevent colonization 2 by *Campylobacter*?

3 Thomas Rawson<sup>1,\*</sup>, Frances M. Colles<sup>2</sup>, Adrian L. Smith<sup>3</sup>, Marian Stamp Dawkins<sup>4</sup>, and  
4 Michael B. Bonsall<sup>1</sup>

5 <sup>1</sup>Mathematical Ecology Research Group, University of Oxford, Department of Zoology, Oxford, OX1 3PS, U.K.

6 <sup>2</sup>Peter Medawar Building for Pathogen Research, Department of Zoology, University of Oxford, South Parks Road,  
7 OX1 3SY

8 <sup>3</sup>Comparative Infection and Immunology Group, Peter Medawar Building for Pathogen Research, Department of  
9 Zoology, University of Oxford, South Parks Road, OX1 3SY

10 <sup>4</sup>University of Oxford, Department of Zoology, John Krebs Field Station, Wytham, Oxford, OX2 8QJ, U.K.

11 \*thomas.rawson@zoo.ox.ac.uk

## 12 ABSTRACT

Using data on rearing and welfare metrics of multiple commercial broiler flocks from the last ten years, we investigate how welfare measures such as hock burn, mortality, weight, and pododermatitis, among others, impact the likelihood of a flock becoming colonized by *Campylobacter*. Using both logistic regression and Bayesian networks, we show that, while some welfare metrics were weakly related to *Campylobacter* colonization, evidence could not be found to suggest that these metrics actively exacerbated *Campylobacter* colonization, rather that they were both symptoms of the same underlying cause. Instead, observed dependency on the management of the flock suggested that yet-undiscovered differences in rearing practise were the principal cause of both poor bird welfare and increased risk of *Campylobacter*, suggesting that action can be taken to improve both these factors simultaneously.

14 **Keywords:** Broiler, Welfare, *Campylobacter*, Logistic regression, Bayesian network

## INTRODUCTION

15  
16 For several years campylobacteriosis has been the most frequently observed zoonotic disease in humans throughout the EU  
17 ([Westrell et al., 2009](#)), with poultry meat identified as a leading infection route ([EFSA Panel on Biological Hazards \(BIOHAZ\),](#)  
18 [2011](#)). This acute form of food poisoning, characterised by diarrhea, fever, and abdominal pain, is estimated to affect 450,000  
19 individuals a year in the UK, approximately ten percent of which result in hospitalisation ([Strachan and Forbes, 2010](#)). An  
20 investigation by Public Health England into the extent of *Campylobacter* within the poultry industry revealed that seventy-three  
21 percent of supermarket chicken carcasses were found to contain *Campylobacter* and seven percent of the outer packaging was  
22 similarly contaminated ([Jorgensen F, Madden RH, Arnold E, Charlett A, Elviss NC, 2015](#)). This considerable public health bur-  
23 den posed by *Campylobacter* spp. represents an estimated £50 million annual economic cost to the UK ([Tam and O'Brien, 2016](#)).

24  
25 Given the extent to which *Campylobacter* dominates commercial chicken flocks, attempting to reduce the proliferation  
26 of the pathogen at farm level would have significant impacts in reducing disease incidence in humans. Once *Campylobacter* is  
27 first identified within a broiler flock (chickens grown specifically for their meat), colonization of all birds occurs very rapidly  
28 ([Evans and Sayers, 2000](#)). In experimental studies, it can take only a single week for an entire flock to become infected  
29 following the introduction of a single infected bird ([Stern et al., 2001](#)). This speed of proliferation makes identifying the initial  
30 point of entry of *Campylobacter* into a flock challenging, and has resulted in a focus on preventative measures.

31  
32 To-date, the poultry industry has largely focused upon on-farm biosecurity measures ([Fraser et al., 2010](#); [Gibbens et al.,](#)  
33 [2001](#)), such as boot-dips and improved cleaning of housing. However, little impact in reducing incidence has been achieved with  
34 these measures ([Hermans et al., 2011](#)). As such, research has instead turned to a broad array of preventative measures ([Ghareeb](#)  
35 [et al., 2013](#)), such as treatment of food and water ([Peh et al., 2020](#)), probiotics ([Saint-Cyr et al., 2016](#)), and bacteriophage  
36 therapy ([El-Shibiny et al., 2009](#)). Such measures have thus far had mixed, and at times contradictory, success.

37  
38 One area of research still greatly overlooked is the role of bird welfare in the emergence of *Campylobacter* within a flock, both  
39 as a potential indicator of *Campylobacter* colonization, and as a driving factor. *Campylobacter* spp. were long considered to be  
40 commensal within broiler chickens, but recent studies have begun to suggest they may be pathogenic under some circumstances  
41 ([Humphrey et al., 2014](#); [Wigley, 2015](#)). Some welfare measures in the past have been observed to correlate with changes in  
42 the gut microbiota and immune response of birds, such as stocking density ([Gomes et al., 2014](#); [Guardia et al., 2011](#)), food  
43 withdrawal, and heat stress ([Burkholder et al., 2008](#)). More directly, lesions on the footpad and arthritis have been shown to be  
44 strong predictors of *Campylobacter* prevalence ([Alpigiani et al., 2017](#)), further supporting findings that flock movement patterns  
45 and behaviour can also accurately predict *Campylobacter* prevalence ([Colles et al., 2016](#)). Our own previous mathematical  
46 modelling studies have highlighted the potential for stocking density ([Rawson et al., 2019](#)) to impact the population dynamics  
47 of *Campylobacter* within a flock, and have also shown that the colonization status of an entire flock is greatly impacted by the

## BROILER WELFARE AND *CAMPYLOBACTER*

48 most susceptible birds within the flock (Rawson et al., 2020), suggesting that attention to individual birds must not be overlooked.

49

50 This study investigates the relationship between multiple welfare indicators on *Campylobacter* prevalence in flocks using two  
51 different mathematical modelling approaches. We firstly employ a logistic regression analysis to test for direct relationships  
52 between *Campylobacter* colonization and predictor variables, such as weight, mortality, and hock burn incidence. While this  
53 methodology has long served as a useful tool for highlighting potential relationships between variables, it cannot elucidate  
54 the exact mechanism of such a relationship, nor how these relationships interact with one another. We combine our logistic  
55 regression with a Bayesian network analysis to demonstrate the network of conditional dependencies between variables, to  
56 investigate more precisely how variables affect and impact each other. In combination with the logistic regression analysis, we  
57 are able to posit where welfare directly increases the likelihood of *Campylobacter* colonization, or to what extent infection by  
58 this bacteria is a symptom of the same root cause.

59

60 The greatest challenges to welfare-focused studies is ensuring a broad collection of data from varied sources, and using  
61 easily reproducible metrics. Studies utilising welfare concepts such as the ‘Welfare Quality®’ (De Jong et al., 2016) or the  
62 ‘five freedoms’ (Iannetti et al., 2020) are useful, but can be difficult to recreate due to differences in individual assessment. To  
63 this end, this study uses data spanning six years from multiple farms, logging reproducible metrics, such as temperature, flock  
64 parent age, pododermatitis rates, and flock size, amongst others.

65

## MATERIALS AND METHODS

### **Data**

67 Data was provided across six years (2010 to 2015) from multiple farms throughout the UK. Each data point represents a flock  
68 of broilers, listing multiple welfare parameters and rearing information, as well as a measure of whether the flock tested positive  
69 for *Campylobacter*. All variables measured for flocks are detailed and defined below:

- 70 • **Company** - A two-factor categorical variable, depicting whether the flock is overseen by company “1” or “2”. This  
71 variable will also therefore capture differences in company-specific rearing methodologies not represented by our current  
72 list of predictor variables.
- 73 • **Farm** - A categorical variable, further delineating the *Company* measure, detailing which farm the flock was located at,  
74 so as to investigate trends unique to certain locations.
- 75 • **Number placed** - A numerical variable describing how many broilers made up the flock. While modelling studies have  
76 primarily implicated stocking density as a high *Campylobacter* risk factor, the total flock population may also increase  
77 the likelihood of initial flock inoculation (Rawson et al., 2019).
- 78 • **Date placed** - The date the flock was first placed into the house. *Campylobacter* is well reported to show seasonal trends,

## BROILER WELFARE AND *CAMPYLOBACTER*

79 with the warmer, summer months seeing flocks test positive for *Campylobacter* more frequently (Djennad et al., 2019;  
80 Nylen et al., 2002).

81 • **Breed** - A three-factor variable describing the breed of broilers grown. Two commercial breeds of broiler were  
82 investigated, with flocks comprised of either: Breed A, Breed B, or a mixture of Breed A & B. Both breeds refer to the  
83 breeding companies, each with many different genetic lines of broiler. Host-bird genetics have been shown to impact  
84 *Campylobacter* prevalence (Babacan et al., 2020; Psifidi et al., 2021; Stern et al., 1990), hence the consideration of the  
85 genetic line of the flock.

86 • **Number of parent flocks** - The number of parent flocks the broiler flock was sourced from. While the possibility of  
87 vertical transmission of *Campylobacter* is still debated, the hypothesis is that a greater number of parent flocks could  
88 increase the number of *Campylobacter* sequence types (and thus phenotypic specialisations) that a flock is exposed to at  
89 hatch (Petersen et al., 2001).

90 • **Mean parent age** - The average age (in weeks) of all parent flocks sourced from. Parent age has been shown to impact  
91 egg weight and embryo weight (Shanawany, 1984), and thus could potentially impact the general health of the chick.

92 • **7/14/21/28/35/Total mortality percentage** - Six different variables, describing the percentage of the flock that had died  
93 after  $x$  days.

94 • **Pododermatitis percentage** - What percentage of the flock suffered from pododermatitis; inflammation and ulcers on the  
95 footpad and toes. This was measured post-mortem by abattoir staff.

96 • **Hock burn percentage** - What percentage of the flock suffered from hock burn; areas where ammonia from the waste of  
97 other birds has burned through the skin of the leg. This was measured post-mortem by abattoir staff.

98 • **7/14/21/28/35/Final day weight** - Six variables showing the mean weight of the flock, in grams, at weekly intervals.

99 • **Maximum/minimum temperature** - A variable describing the maximum and minimum recorded *external* temperature,  
100 in degrees centigrade, for the time the flock was housed, as sourced from historical records for from the Met Office for  
101 the nearest weather station.

102 • ***Campylobacter* 21/28/35 days** - A two-factor variable depicting whether a flock was found to be positive or negative for  
103 *Campylobacter* after 21/28/35 days. This was sampled via fabric boot swabs in the flock house at 21/28/35 days. In  
104 addition, fresh faecal samples were collected concurrently on day 28. *Campylobacter* prevalence was then tested for in  
105 all samples via culture methods. Full details of this methodology are given in Colles et al. (2016).

106 A total of 212 flocks were monitored, however not all variables could be measured for all flocks due to the practical difficulties  
107 in obtaining all measures from farms. As such there is some degree of missing data across all variables, most notably that only  
108 149 of these flocks have a final record of *Campylobacter* infection status. Before incorporating this data into a mathematical

## BROILER WELFARE AND *CAMPYLOBACTER*

109 model, we must consider the detail of data available given the absence of some variables for some flocks. To ensure the  
110 maximum number of flocks are able to be used in model fitting, a balance must be found between filtering out variables to  
111 increase data availability, while not overly limiting the number of variables investigated. We detail these decisions below.

### 112 ***Data Cleaning***

113 Before beginning the regression analysis, we clean and simplify our data to aid interpretation. The *Campylobacter* variables  
114 across time points 21, 28, and 35 days were simplified to a single variable that reads as positive if a flock was recorded positive  
115 on any of the three dates recorded, and negative if the flock was reported negative on all of the measured dates provided. This  
116 was to increase the data availability, as some flocks were only measured on certain dates. There were six instances of a flock  
117 being recorded as negative after previously testing positive. These six instances were cases where the faecal samples taken on  
118 day 28 tested positive, but the boot swab on day 35 tested negative. It was considered appropriate to rely on the more targeted  
119 faecal sample for these six cases.

120  
121 The *Date placed* variable was converted to a 4-level factor variable, denoting the season that the flock was reared in. This was  
122 done as date is known to have a non-linear effect on *Campylobacter* prevalence (Jorgensen et al., 2011), with incidence in both  
123 flocks and humans more frequently observed in the UK summer compared to the winter (Louis et al., 2005). It is this effect that  
124 we wish to investigate as opposed to variation between years. Season classification is partitioned by the dates December 1st,  
125 March 1st, June 1st, and September 1st, aligning with the meteorological seasons, which more accurately capture temperature  
126 variation than the astronomical seasons classification.

127  
128 Regression analysis requires that the explanatory variables be independent of the response variable (and each other) oth-  
129 erwise predictive power is weakened across all dependent descriptor variables. In some cases, parameters of the linear  
130 model then become indeterminate due to the high degree of multicollinearity. For example, the *7/14/21/28/35/Total mortality*  
131 *percentage* variables are, as expected, all highly correlated with one another, hence we use only the *28-day mortality percentage*  
132 measure, as this is the one that most data was available for. We do the same for the average bird weight variables. Likewise, the  
133 *Company* variable was removed for the logistic regression, as it is heavily correlated with the *Farm* variable (companies do not  
134 share farms), however the *Farm* variable was also then found to have very strong correlation with the *Number placed* variable.  
135 For this reason the *Farm* variable is also removed, as *Number placed* is a preferred metric of interest. Similarly, we use only  
136 the *Minimum temperature*, and not the *Maximum temperature*, or the *Date placed*, as these three are strongly correlated. By  
137 reducing the number of model predictors, the generalised variance-inflation factors (GVIF) (Fox and Monette, 1992) of all  
138 variables are less than 3, far less than the commonly-used threshold of 10.

139  
140 Finally, the data was filtered to remove any flocks with missing values for the explanatory variables under consideration. 84  
141 data points remained for the final mathematical model. Flocks with missing data were later utilised for the parameter learning

BROILER WELFARE AND *CAMPYLOBACTER*

**Table 1.** Factor variable summaries

| Variable           | Factor level | Total | <i>Campylobacter</i> positive | <i>Campylobacter</i> negative |
|--------------------|--------------|-------|-------------------------------|-------------------------------|
| <i>Company</i>     | 1            | 49    | 22                            | 27                            |
|                    | 2            | 35    | 20                            | 15                            |
| <i>Farm</i> *      | C1-F1        | 49    | 22                            | 27                            |
|                    | C2-F1        | 15    | 7                             | 8                             |
|                    | C2-F2        | 11    | 7                             | 4                             |
|                    | C2-F3        | 9     | 6                             | 3                             |
| <i>Breed</i>       | A            | 32    | 20                            | 12                            |
|                    | B            | 48    | 21                            | 27                            |
|                    | A & B        | 4     | 1                             | 3                             |
| <i>No. Parents</i> | 1            | 39    | 23                            | 16                            |
|                    | 2            | 25    | 13                            | 12                            |
|                    | 3            | 15    | 5                             | 10                            |
|                    | 4            | 5     | 1                             | 4                             |
| <i>Date placed</i> | Spring       | 24    | 19                            | 5                             |
|                    | Summer       | 18    | 17                            | 1                             |
|                    | Autumn       | 16    | 1                             | 15                            |
|                    | Winter       | 26    | 5                             | 21                            |

\* Company 1 has only one farm ‘C1-F1’. Company 2 has three farms; ‘C2-F1’, ‘C2-F2’, ‘C2-F3’.

**Table 2.** Continuous variable summaries

| Variable                           | Mean   | Standard Deviation |
|------------------------------------|--------|--------------------|
| <i>Number placed</i>               | 27,639 | 7,283              |
| <i>Mean parent age</i>             | 39.13  | 9.82               |
| <i>28-day mortality percentage</i> | 3.87   | 1.40               |
| <i>Pododermatitis percent</i>      | 57.62  | 28.48              |
| <i>Hock burn percent</i>           | 20.00  | 18.95              |
| <i>28-day average bird weight</i>  | 1419.6 | 83.2               |
| <i>Minimum temperature</i>         | 6.59   | 3.70               |

142 stage. A summary table of all variables considered in the final model is presented in Tables 1 and 2.

143 **Logistic Regression**

144 Multiple logistic regression is an adaptation of multiple linear regression for instances where the response variable of interest is  
 145 a two-factor binary output ( $Y \in \{0, 1\}$ ), in our case where a flock is either *Campylobacter* negative or positive. A multiple  
 146 linear regression model structures the response variable,  $Y$ , as a linear predictor of a set of explanatory variables,  $X_i$ , like so;

$$Y = \beta_0 + \beta_1 X_1 + \beta_2 X_2 + \dots + \beta_n X_n,$$

147 for  $n$  variables, and where  $\beta_i$  are the coefficients to be determined. A logistic regression instead models  $p = P(Y = 1)$ , the

## BROILER WELFARE AND *CAMPYLOBACTER*

148 probability that  $Y = 1$ , as:

$$\text{logit}(p) = \beta_0 + \beta_1 X_1 + \beta_2 X_2 + \dots + \beta_n X_n, \quad (1)$$

149 where  $\text{logit}()$  is the log-odds ratio  $\text{logit}(p) = \log \frac{p}{1-p}$ , which ensures that  $p$  is bounded between 0 and 1. To model the  
150 impact of factor variables with  $m$  levels, we use treatment contrasts;  $m - 1$  distinct descriptor variables within the model. For  
151 example, consider a simplified model which investigated the impact of breed alone on the probability of a flock being colonized  
152 by *Campylobacter* ( $p$ ). *Breed* has three factor levels; ‘Breed A’, ‘Breed B’, and ‘Breed A & B’, and therefore the logistic  
153 regression model would be:

$$\text{logit}(p) = \beta_0 + \beta_1 X_1 + \beta_2 X_2,$$

154 where Breed A, is represented by  $X_1 = X_2 = 0$ , Breed B by  $X_1 = 1, X_2 = 0$ , and the mixture of Breed A & B by  $X_2 = 1, X_1 = 0$ .

155

156 Nine explanatory variables were used for the final maximal logistic regression fit: *Number placed*, *Breed*, *Mean parent*  
157 *age*, *Number of parent flocks*, *28-day mortality percentage*, *Pododermatitis percentage*, *Hock burn percentage*, *28-day average*  
158 *weight*, and *Minimum temperature*. After initially fitting the maximal model of nine explanatory variables, a step wise  
159 simplification is then performed, removing the least significant term iteratively to finally reach the minimal adequate model: a  
160 model composed of only statistically significant explanatory variables. The model was fit using the `glm` package in R, which  
161 fits the model via iteratively reweighted least squares (IWLS). All code is made freely available at [osf.io/pb62g/](https://osf.io/pb62g/).

### 162 **Bayesian network**

163 Bayesian networks are probabilistic graphical models that display the network of conditional dependencies between a collection  
164 of variables. Each variable in the model is visually represented as a node, with directed edges, called ‘arcs’, between nodes  
165 representing a directly dependent relationship.  $A \rightarrow B$  indicates that  $B$  depends on  $A$ . Since arcs are directed, there is a  
166 cause-and-effect (from-and-to) relationship between variables. A node with an arc directed towards another node is called a  
167 ‘parent’ node to the respective ‘child’ node. Each node’s output is then explicitly detailed by a probability distribution that is  
168 dependent on any and all parent variables. This highlights the two greatest strengths of Bayesian networks as tools to investigate  
169 relationships between variables: firstly, the Markov property imposed by the network of conditional dependencies, means that  
170 the global probability distribution of the system can be expressed as a far smaller product of dependent probabilities. As such, a  
171 large and complicated probabilistic system can be simplified by knowledge of how some variables do or do not influence one  
172 another. Secondly, these types of models provide a straightforward way of visually conveying how certain explanatory variables  
173 influence (or do not influence) each other, something that would otherwise require the analysis of a large variety of logistic



## BROILER WELFARE AND *CAMPYLOBACTER*

174 regression models, and could easily overlook certain dependencies. As a result of this architecture, “cycles” are by definition  
175 not allowed within a Bayesian network, meaning a path cannot be drawn from any node back to itself. Such a structure is called  
176 a directed acyclic graph (DAG). We provide a short example below to understand how such networks are calculated, but greater  
177 insight can be found in [Nagarajan et al. \(2013\)](#).

178

179 Calculating a Bayesian network model is separated into two tasks. Firstly, structural learning: learning the network model  
180 of dependencies (i.e. identifying all arcs in the system), followed by parameter learning: finding the specific parameters of  
181 probability distributions linking parent to child nodes. Consider an example of a dataset of three discrete variables in a broiler  
182 flock we wish to explore: *Mortality* (low, average, high), *Age* (young, adult, old), and *Feather condition* (good, average, poor).  
183 We start by learning the structure between these three variables. Many algorithms and approaches exist for finding the structure  
184 of a Bayesian network ([Bouchaala et al., 2010](#)), however within this paper we utilise the hill-climbing algorithm ([Bouckaert,](#)  
185 [1995](#)), a score-based structure learning algorithm. The algorithm starts with a randomly chosen graph (though usually the  
186 empty graph made up of no arcs), and calculates a network score that ascertains how effectively such a graph describes the data.  
187 It then iteratively adds, removes and reverses one arc at a time, altering the global probability distribution via the introduction  
188 (or removal) of a dependency, selecting the alteration that increases the network score the most. This process is then repeated  
189 until no further improvement can be found. Multiple network scores can be used, but we use the Bayesian information criterion  
190 (BIC) ([Bhat and Kumar, 2010](#)), a variation on the traditional likelihood function. After using this algorithm on our example  
191 data, we discover the “best” network as being the network of two arcs shown in Figure 1.

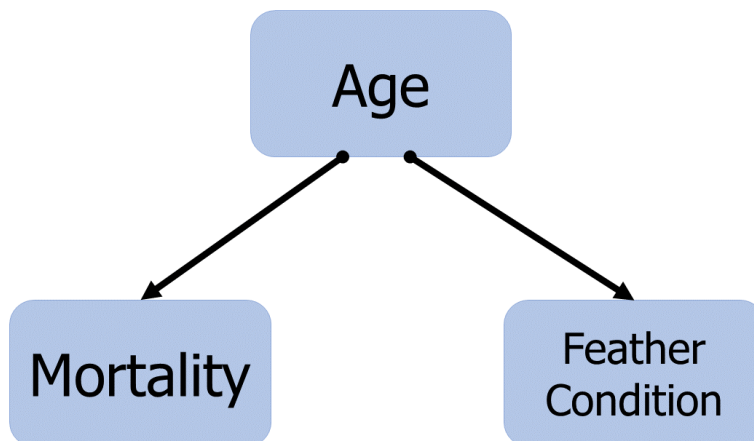

**Figure 1.** Bayesian network for the example problem posed. Two conditionally dependent relationships are found, from *Age* to *Mortality* and from *Age* to *Feather condition*. This example relationship was demonstrated by [Comin et al. \(2019\)](#).

192

193 We see from Figure 1 that *Age* is a parent variable to both *Mortality* and *Feather condition*. This indicates that, from this  
194 imagined example data, *Age* directly informs the mortality rate of a bird and the feather condition of the bird (this result was



## BROILER WELFARE AND *CAMPYLOBACTER*

195 directly demonstrated by [Comin et al. \(2019\)](#)). An important insight gained from this network analysis would be that *Mortality*  
196 and *Feather condition* would likely be found to be correlated via a logistic regression analysis. However, *Feather condition*  
197 itself does not affect *Mortality*, rather they are both impacted by the same direct cause; *Age*. This illustrative example shows the  
198 objective of the Bayesian network approach to our particular question; what **causes** *Campylobacter* to colonize a flock, rather  
199 than just what is correlated with *Campylobacter* colonization. Another advantage of such a model, means that inference can be  
200 made even with missing data. The network of Figure 1 presents a structure whereby the mortality of a bird can be predicted  
201 with data on their feather condition, as this gives important indication of what the age of the bird may be. In Bayesian terms,  
202 this informs our prior belief as to the age of the bird, thus impacting our posterior belief as to the mortality of the bird. In  
203 contrast, the logistic regression approach would require an assumption on the age of such an individual, usually the mean of the  
204 training data, but no such requirement exists for Bayesian networks. Note, however, that if the age of a broiler is known, the  
205 prediction of their relative mortality rate is not improved by further information on their feather condition, as mortality is found  
206 to be predicted by age alone.

207

208 Note also from Figure 1 the mathematical advantage of such a network for expressing the joint probability distribution  
209 of the system. By definition the arcs indicate that  $P(\text{Age}, \text{Mortality}, \text{Feather Condition})$  can be expressed as

$$P(\text{Age}, \text{Mortality}, \text{Feather Condition}) = P(\text{Age})P(\text{Mortality}|\text{Age})P(\text{Feather Condition}|\text{Age}).$$

210 Since each variable has three factor levels, this reduces a distribution of 27 ( $3^3$ ) parameters, to 21, where each arc indicates  
211 that the child variable is modeled by a multinomial distribution dependent on the parent variable.

212

213 Indeed, for the second step, parameter estimation, we treat each node as being described by a multinomial distribution,  
214 and fit these using two separate well-known techniques, the maximum likelihood estimator (MLE), and a nested Bayesian  
215 approach, using uninformative uniform priors. See Appendix 1 for a brief introduction to Bayesian statistical inference.

216

217 A further benefit to a Bayesian network model is that we do not need to test for multicollinearity, which required us to  
218 remove several variables from consideration in the logistic regression, as structure learning specifically investigates these  
219 inter-variable correlations. As such we are able to include *Company*, *Farm*, and *Date placed* within our Bayesian network  
220 model. We also include the *7-day bird weight*, and *7-day mortality percentage* variables, alongside the 28-day measures, to  
221 serve both as a sanity check (we would expect these two variables to be linked), but also to increase the predictive power of the  
222 model, so inference could be made on the *Campylobacter* status of a flock from the 7-day as well as 28-day measures. This  
223 decision did however reduce the number of available training data from 84 to 81.

224

## BROILER WELFARE AND *CAMPYLOBACTER*

225 All of these introduced methodologies are implemented using the `bnlearn` package in R (Scutari, 2009), and all code  
226 used in the model analysis is provided at [osf.io/pb62g](https://osf.io/pb62g).

### 227 **Discretisation**

228 While we have displayed the many inherent strengths of Bayesian network models, one considerable weakness is the implemen-  
229 tation of models consisting of both discrete and continuous variables. While methodologies exist for the assessment of such  
230 “hybrid” Bayesian networks (Scutari and Denis, 2014), the approaches are considerably more computationally demanding, and  
231 require a greater amount of data to give a robust fit to a Bayesian network. Given the comparatively smaller size of our training  
232 data ( $n = 84$ ), we instead take the commonly used route of discretisation, whereby our continuous variables are converted  
233 into discrete bins. Of the many approaches to discretisation, a wide-ranging comparison by Kohavi and Sahami (1996) found  
234 the best approach to be the supervised, entropy-based Minimal Description Length (MDL) (Fayyad and Irani, 1993) method,  
235 whereby each variable is discretised based upon its informative potential on a variable of interest. This approach was undertaken  
236 on our data, in relation to the *Campylobacter* variable, using the `FSelectorRcpp` package in R. However, only *Minimum*  
237 *temperature* was found to be able to discretised in such a way (foreshadowing our later results). As such, we instead used a  
238 quantile binning (equal-frequency) approach, to separate out our continuous variables into three bins of equal frequency, and  
239 confirming against the histograms for each variable that no obvious separation was missed. These bin intervals are provided in  
240 Table 3.

**Table 3.** Discretisation intervals of continuous variables for the Bayesian network model

| Variable                           | Bin 1 Intervals | Bin 2 Intervals    | Bin 3 Intervals  |
|------------------------------------|-----------------|--------------------|------------------|
| <i>Number placed</i>               | [11770, 22000]  | (22000, 33503.3]   | (33503.3, 34650] |
| <i>Mean parent age</i>             | [25, 32]        | (32, 44.78]        | (44.78, 58]      |
| <i>7-day mortality percentage</i>  | [0.65, 1.21]    | (1.21, 1.81]       | (1.81, 7.26]     |
| <i>28-day mortality percentage</i> | [1.97, 3.06667] | (3.06667, 4.05667] | (4.05667, 9.61]  |
| <i>Pododermatitis percent</i>      | [1, 42.6667]    | (42.6667, 76]      | (76, 95]         |
| <i>Hock burn percent</i>           | [0, 10]         | (10, 20]           | (20, 90]         |
| <i>7-day average bird weight</i>   | [144, 170.667]  | (170.667, 181]     | (181, 213]       |
| <i>28-day average bird weight</i>  | [1138, 1388.33] | (1388.33, 1475.33] | (1475.33, 1565]  |
| <i>Minimum temperature</i>         | [1.3, 4]        | (4, 8.7]           | (8.7, 13.8]      |

### 241 **Banned Arcs**

242 To both aid the structure learning process, and to disallow erroneous network structures, we also introduce a list of banned arcs,  
243 defining all arcs which are not to be considered by the algorithm, based on logical reasoning. For example, we do not allow any  
244 arcs directed towards the *Company* variable, as this is clearly not affected by any other variables. While the company that a  
245 flock belongs to may in turn affect the mean parent bird age for example, it is illogical to say that the mean parent bird age  
246 could affect which company the flock is managed by. *Company* is a variable that is predetermined before the flock even hatches,  
247 and as such cannot be influenced by factors that occur during the lifespan of the flock. A full list of these banned illogical arcs  
248 is provided with all associated code in the online repository.

BROILER WELFARE AND *CAMPYLOBACTER*

**Table 4.** Logistic regression analysis of the minimal adequate model for 84 broiler flocks using the `glm` function in R.

| Predictor                             | $\beta$ (Estimate) | SE $\beta$ | Wald-test z-score | <i>p</i>              | $e^{\beta}$ (odds ratio) |
|---------------------------------------|--------------------|------------|-------------------|-----------------------|--------------------------|
| (Intercept)                           | -1.490             | 0.621      | -2.398            | <b>0.0165</b>         | NA                       |
| <i>Breed</i> (1 = Breed B, 0 = Other) | -1.474             | 0.628      | -2.348            | <b>0.0189</b>         | 0.225                    |
| <i>Hock burn percentage</i>           | -0.041             | 0.0189     | -2.165            | <b>0.0304</b>         | 0.960                    |
| <i>Minimum temperature</i>            | 0.469              | 0.105      | 4.474             | <b>≤ 0.0001</b>       | 1.599                    |
| Test                                  |                    |            | $\chi^2$          | <i>p</i>              |                          |
| Overall model evaluation              |                    |            |                   |                       |                          |
| Likelihood ratio test <sup>1</sup>    |                    |            | 35.972            | $7.59 \times 10^{-8}$ |                          |
| Likelihood ratio test <sup>2</sup>    |                    |            | 7.776             | 0.557                 |                          |
| Goodness of fit                       |                    |            |                   |                       |                          |
| McFadden's $R^2$                      | 0.309              |            |                   |                       |                          |
| Cox & Snell's $R^2$                   | 0.348              |            |                   |                       |                          |

<sup>1</sup> Compared against null model.

<sup>2</sup> Compared against maximal model.

## RESULTS

### Logistic Regression

The results of the logistic regression for the minimal adequate model are presented in Table 4, alongside a variety of model evaluation metrics. Appendix 2 shows the analysis of the original maximal model comprised of all explanatory variables, and describes the reduction steps taken to reach the minimal adequate model.

Three variables were found to be statistically significant in relation to the *Campylobacter* status of a flock via the Wald-test: *Breed*, *Hock burn percentage*, and *Minimum temperature*. Note that for the minimum adequate model, while Breed B flocks were found to be statistically significantly different to Breed A birds with relation to *Campylobacter* incidence, the mixed breed flocks were not found to differ from Breed A flocks. As such, the 'Breed A' and 'Breed A & B' flocks were collapsed into one variable for the minimal adequate model. Table 4 shows that flocks of Breed B birds were found to be 0.225 times as likely to test positive for *Campylobacter* than any other flock. *Hock burn percentage* was, unintuitively, found to have a negative correlation with *Campylobacter* colonization. *Minimum temperature* was very strongly correlated, with an odds ratio showing that an increase of 1 degree to the minimum recorded temperature corresponded with a flock being 1.599 times more likely to test positive for *Campylobacter*. The generalised variance-inflation factors (GVIF) (Fox and Monette, 1992) of all variables in the minimal adequate model was less than 2, and all variables of the maximal model (Appendix 2) had a GVIF of less than 3, far less than the commonly-used threshold of 10.

## BROILER WELFARE AND *CAMPYLOBACTER*

### 266 **Bayesian network**

267 Figure 2 displays the final global network structure, fit using the hill-climbing algorithm, and with networks scored via BIC.  
268 This was run using the `bnlearn` package in R. The strength of individual arcs (as measured by BIC) is represented by  
269 arrow-width in Figure 2. Table 5 also explicitly provides these arc strength scores.

270

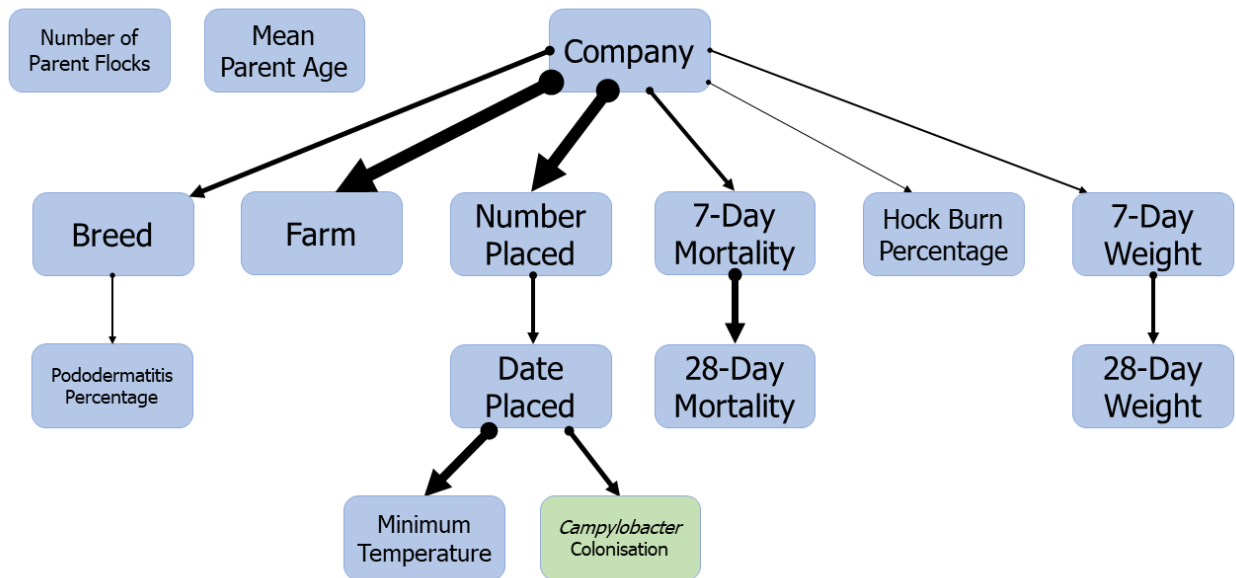

**Figure 2.** Bayesian network structure showing the interrelationships between multiple welfare and rearing practice factors in a flock of broilers. *Campylobacter* colonization is directly impacted by the season the flock is grown in. Structure was learned using a hill-climbing algorithm, and sampled networks scored using the Bayesian information criterion (BIC). Arrow-width indicates arc strength as scored by BIC, the values of which are given in Table 5.

271 To test the significance of the fit structure, structure learning was also performed with a tabu search algorithm, and by  
272 introducing random network restarts into the hill-climbing algorithm (10, 100, and 1000 random restarts were all performed),  
273 all of which resulted in the same network structure. We also performed a hill-climbing structure learning algorithm using the  
274 logarithm of the Bayesian Dirichlet equivalent score (BDE) (Castelo and Siebes, 2000), as opposed to the BIC, a Bayesian-based  
275 score equivalent to the Dirichlet posterior density (and initialised with uniform priors). This scoring metric resulted in a very  
276 similar network structure which we present in Appendix 3. The only differences were that, (i) *Hock burn percentage* no longer  
277 had *Company* as a parent node, meaning it was unconnected to any other node. (ii) *Minimum temperature* had an additional arc  
278 from itself to *Campylobacter* colonization, suggesting that *Campylobacter* could also be impacted by temperature variation  
279 throughout the season; and finally, (iii) an additional arc was introduced from *Breed* to *Number placed*, simply representing that  
280 flocks of Breed B birds were larger in size than flocks of Breed A birds.

281

BROILER WELFARE AND *CAMPYLOBACTER*

**Table 5.** Arc strengths of the Bayesian network shown in Figure 2. Arc strength is measured by Bayesian information criterion (BIC), where a lower value indicates a stronger link.

| Parent                            | Child                              | Arc Strength |
|-----------------------------------|------------------------------------|--------------|
| <i>Company</i>                    | <i>Breed</i>                       | -16.656      |
| <i>Company</i>                    | <i>Farm</i>                        | -47.756      |
| <i>Company</i>                    | <i>Number placed</i>               | -43.069      |
| <i>Company</i>                    | <i>7-day mortality percentage</i>  | -11.975      |
| <i>Company</i>                    | <i>Hock burn percentage</i>        | -0.234       |
| <i>Company</i>                    | <i>7-day weight</i>                | -3.644       |
| <i>Breed</i>                      | <i>Pododermatitis percentage</i>   | -2.236       |
| <i>Number placed</i>              | <i>Date placed</i>                 | -6.272       |
| <i>7-day mortality percentage</i> | <i>28-day mortality percentage</i> | -20.876      |
| <i>7-day weight</i>               | <i>28-day weight</i>               | -6.031       |
| <i>Date placed</i>                | <i>Minimum temperature</i>         | -29.040      |
| <i>Date placed</i>                | <i>Campylobacter colonization</i>  | -17.246      |

282 Other results to be noted from Figure 2 is that neither the number of different parent flocks that a broiler flock was born  
 283 from, nor the mean age of these parent was found to have any correlation to any other variable. *Pododermatitis* was interestingly  
 284 found to be influenced by the *Breed* of broiler comprising the flock. We also see that many variables are directly influenced by  
 285 the *Company* variable, suggesting that many observed differences are due to, yet unobserved, differences between management  
 286 practise.

287

288 Figure 2 shows that the season (*Date placed*) in which a flock is reared is the sole parent node to *Campylobacter* sta-  
 289 tus. This means that *Date placed* alone captures the uncertainty and probabilistic distribution of whether or not a flock is likely  
 290 to test positive for *Campylobacter*. This means that while data on the number of birds in the flock (*Number placed*) can inform  
 291 whether or not a flock is *Campylobacter* positive, this data is superfluous when one has knowledge of the *Date placed*. The  
 292 conditional probability table for *Campylobacter* colonization is given in Table 6. These model parameters can be fit either  
 293 via maximum likelihood estimators (MLE) or through Bayesian inference. Model parameters via both methods are provided  
 294 in Table 6. Note that one advantage of the Bayesian inference method is that this approach can learn parameters from data  
 295 containing missing values. Hence while the MLE parameters are fit from the 84 data points used in structure learning, the  
 296 Bayesian inference method uses 114 data points, incorporating those that were removed from structure learning due to missing  
 297 values.

298

299 Conditional probability tables for *Campylobacter* dependent on all other variables, assuming the absence of data on any other  
 300 variable, are provided in Appendix 4.

## BROILER WELFARE AND *CAMPYLOBACTER*

**Table 6.** Conditional probability table for *Campylobacter* colonization status. We present values calculated by Bayesian inference using uniform priors, and an equivalent sample size of 10. Below that we present values calculated via a maximum likelihood estimator.

| Bayesian Inference                |                    |        |        |        |
|-----------------------------------|--------------------|--------|--------|--------|
|                                   | <i>Date placed</i> |        |        |        |
| <i>Campylobacter</i> colonization | Spring             | Summer | Autumn | Winter |
| Negative                          | 0.273              | 0.071  | 0.878  | 0.802  |
| Positive                          | 0.727              | 0.929  | 0.122  | 0.198  |

  

| Maximum Likelihood Estimator      |                    |        |        |        |
|-----------------------------------|--------------------|--------|--------|--------|
|                                   | <i>Date placed</i> |        |        |        |
| <i>Campylobacter</i> colonization | Spring             | Summer | Autumn | Winter |
| Negative                          | 0.217              | 0.063  | 0.937  | 0.808  |
| Positive                          | 0.783              | 0.937  | 0.063  | 0.192  |

## DISCUSSION

301

302 Here, through a combination of both logistic regression and Bayesian network analysis, we have investigated the interrela-  
303 tionships between a selection of welfare and rearing practice explanatory variables for multiple commercial broiler flocks.  
304 At the inception of this work, our hypothesis was that poor welfare indicators such as low weight and hock burn, among  
305 others, would result in an increased risk of colonization by *Campylobacter* due to poor health compromising the immune  
306 response of birds in the flock (Humphrey, 2006). Social stress (Mohamed and Hanson, 1980), heat stress (Burkholder et al.,  
307 2008), and overcrowding stress (Gomes et al., 2014), have all been shown to increase susceptibility to disease in chickens by  
308 compromising the immune response (Heckert et al., 2002; Hirakawa et al., 2020), and in many cases have been correlated with  
309 increased risk of colonization with *Salmonella* (Alhenaky et al., 2017; Gomes et al., 2014). As such it was initially assumed  
310 that similar measures may increase incidence of *Campylobacter* in broiler flocks. While our work has revealed some level  
311 of correlation between poor welfare metrics and *Campylobacter* incidence (see the conditional probabilities of Appendix 4),  
312 these relationships were not found to be statistically significant via a logistic regression model, and our Bayesian network  
313 model suggests that poor bird welfare, as judged by the measures used here, is not in fact a cause of increased *Campylobacter*  
314 colonization. Despite this, our model reveals many yet-unconsidered relationships between rearing variables, provides evidence  
315 against multiple existing hypotheses, and highlights multiple promising new lines of enquiry towards identifying the source of  
316 *Campylobacter* colonization in commercial poultry flocks.

317

318 Our logistic regression analysis, shown in Table 4, identified three statistically significant explanatory variables; *Breed*,  
319 *Minimum temperature* and *Hock burn percentage*, with *p* values of 0.0189,  $7.69 \times 10^{-6}$  and 0.0304 respectively. Seasonal  
320 variation in *Campylobacter* incidence has long been observed in broiler flocks (Jorgensen et al., 2011; Louis et al., 2005), with

## BROILER WELFARE AND *CAMPYLOBACTER*

321 minimum/maximum temperature and sunshine hours significantly correlated with both the incidence and total bacterial load  
322 found in chicken flocks (Wallace et al., 1997). The warmer summer months see greater *Campylobacter* prevalence, yet despite  
323 the large body of research confirming this phenomenon, the precise mechanism for this increase remains unclear. While the  
324 growth rate of *Campylobacter* is found to vary in relation to temperature (Doyle and Roman, 1981), the minimum temperature  
325 required for *Campylobacter* survival is estimated to be around 30 degrees centigrade, somewhat precluding the impact of UK  
326 seasonal temperatures. Previous studies have suggested that the seasonal increase of flies (Hald et al., 2004, 2007), rodents  
327 (Meerburg and Kijlstra, 2007), and wild birds (Colles et al., 2008) as vectors of *Campylobacter* transmission may be responsible,  
328 while seasonal patterns in country-wide clonal complex incidence potentially point to genetic adaptation to seasonal trends  
329 (Jorgensen et al., 2011). Investigating this trend in human incidence of campylobacteriosis, Djennad et al. (2019) conducted a  
330 rigorous statistical assessment of spatial and weather factors, concluding that the correlation between incidence and temperature  
331 was “likely to be indirect”. Our above results reach the same conclusion for broiler colonization. While our logistic regression  
332 shows the strong correlation between temperature and *Campylobacter* colonization, our Bayesian network analysis shows in  
333 Figure 2 that the two variables are conditionally independent upon the date placed, i.e. the correlation is indirect.

334  
335 Footpad dermatitis, commonly referred to as ‘hock burn’, the dark discolouration and ulceration of the lower leg of birds, was  
336 also found to be statistically significantly correlated with *Campylobacter* prevalence, however this relationship was curiously  
337 found to be negatively correlated. These painful lesions are considered a sign of poor bird welfare, usually caused by litter  
338 unsuitably saturated with chicken waste. As such, the suggestion that more instances of hock burn in a flock are linked with  
339 less cases of *Campylobacter* is surprising, considering that the bacteria are transmitted via the faecal-oral route. One hypothesis  
340 is that the presence of *Campylobacter* may in turn limit colonisation of the flock by more pathogenic bacteria that could  
341 more easily trigger diarrhoea within a host-bird, thus impacting the litter quality and the resulting development of hock burn.  
342 Alternatively this relationship may be an artifact of how the *Hock burn percentage* variable was defined. Namely it was recorded  
343 as the cross-sectional prevalence of any signs of hockburn in the flock (Dawkins et al., 2017). In short, it is a measure of how  
344 many birds showed signs of hock burn, and not a measure of the extremity of these burns. Bull et al. (2008) observed this same  
345 effect, whereby the flock-wide presence of hock burn was generally higher in *Campylobacter* negative flocks, however the  
346 number of birds in the flock rejected from consumption due to extreme cases of hock burn was positively correlated with rates  
347 of *Campylobacter* colonization. Figure 2 also concludes that this correlation between *Campylobacter* colonization and hock  
348 burn prevalence is conditionally independent upon the managing company.

349  
350 The Bayesian network structure displayed in Figure 2 reveals a wide variety of insight into the various interrelationships of  
351 the included variables. Firstly we see that the number of parent flocks a broiler flock is sourced from, and the mean age of  
352 these parent flocks, had no meaningful impact on association with any other variable. The feasibility of vertical transmission of  
353 *Campylobacter* from parent to broiler flock is still frequently discussed in the literature, and the inclusion of this variable was



## BROILER WELFARE AND *CAMPYLOBACTER*

354 based upon the hypothesis that a greater number of parent flocks may challenge a broiler flock with a greater genotypic variety  
355 of *Campylobacter* isolates (Petersen et al., 2001). Parent age has also been shown to influence egg weight and embryo weight  
356 of chicks (Shanawany, 1984). Given the potential importance of maternal antibodies in suppressing *Campylobacter* in the first  
357 few weeks of age (Rawson et al., 2019), parent age could potentially impact the likelihood of *Campylobacter* colonization. Our  
358 results however indicate that factors relating to the parent flock have no effect on any of the metrics considered in this study.

359  
360 The logistic regression analysis of the minimum adequate model found statistical significance in the relationship between  
361 *Breed* and *Campylobacter* colonization, where flocks of Breed A birds were more frequently observed to become colonized  
362 than Breed B birds. Caffrey et al. (2021) recently identified a correlation between breed and *Campylobacter*, with flocks  
363 comprised of Cobb birds, or a mixture of Cobb and Ross birds 4.75 times more likely to test positive for fluoroquinolone  
364 resistant *Campylobacter jejuni* than flocks comprised of just Ross birds. Further to this, Cobb birds have been found to be  
365 more frequently colonized by *Campylobacter* than Hubbard birds by Babacan et al. (2020), however they were unable to  
366 separate this association from other rearing factors such as age-of-slaughter. Our Bayesian network analysis, similar to the  
367 hock burn conclusions, was unable to detect any direct arc of causation between *Breed* and *Campylobacter* colonization,  
368 suggesting that the breed of chicken is indicative of the company managing the flock, and not necessarily an indicator of a  
369 breed-specific susceptibility. Host-bird genetics have however previously been shown to cause differences in host-resistance  
370 to *Campylobacter* challenge (Connell et al., 2013; Li et al., 2008; Stern et al., 1990), with such resistances shown to be  
371 inheritable under experimental conditions Boyd et al. (2005). Further linking breed and welfare measures, Humphrey et al.  
372 (2014) found that faster-growing breeds of broiler showed evidence of prolonged inflammation in the intestines in response to  
373 *Campylobacter jejuni*, suggesting that the impact of breed is yet a plausible route of further study. An interesting relationship  
374 observed in Figure 2 was the implication of *Breed* as a determinant of the prevalence of pododermatitis, with flocks of Breed  
375 A birds more frequently displaying heavy incidence of pododermatitis. No study to our knowledge has directly investigated  
376 this supposed relationship in broilers, however one study in turkeys found no correlation between breed and pododermatitis  
377 (Clark et al., 2002). Pododermatitis has previously been shown to be associated with a poor-nutrient diet (Nagaraj et al.,  
378 2007), hence the hypothesis that this factor could correlate with general gut health and/or the composition of the gut microbiome.

379  
380 The primary conclusion of our work, as shown in Figure 2, was that our network of variables was closely related by  
381 yet-unobserved factors concealed within the *Company* variable. *Company* was found to be a parent variable to six factors;  
382 *Breed*, *Farm*, *Number placed*, *7-day mortality*, *Hock burn percentage*, and *7-day weight*. This indicates that these six factors  
383 significantly vary, due to which of the two companies considered within this study they are managed by. This suggests that  
384 choices made within the complex decision network relating to the rearing of these flocks, encompassing factors such as  
385 diet, water provision, housing, thinning protocols, cleaning regimens, antibiotic usage, and stocking density among others  
386 (Sibanda et al., 2018), will have the significant potential to both decrease incidence of *Campylobacter* and may simultaneously

## BROILER WELFARE AND *CAMPYLOBACTER*

387 improve the welfare of the flock. While disappointing to not ascertain the primary root cause of increased *Campylobacter*  
388 prevalence from within our considered set of variables, the work has revealed a key network of dependencies within commonly  
389 recorded and studied metrics. While far from the first study to examine the contributions of multiple health factors towards  
390 *Campylobacter* colonization ([Babacan et al., 2020](#); [Frosth et al., 2020](#); [Humphery et al., 1993](#); [Rushton et al., 2009](#)), our work  
391 is the first, to our knowledge, to utilise the powerful methodologies underlying Bayesian network analysis in studying the  
392 spread of *Campylobacter*. Such approaches, in combination with more traditional logistic regression analyses, greatly increase  
393 the descriptive power of gathered datasets, and it is our hope that this work will help expedite their adoption throughout the  
394 field of *Campylobacter* risk management. Bayesian networks have had some early success already in specifically implicating  
395 welfare measures with specific housing variables ([Comin et al., 2019](#)), we now further our attempts to identify the variables that  
396 exacerbate the spread of *Campylobacter*.

397

398 This study illustrates the need to investigate, more thoroughly, management decisions in the broiler industry, so as to re-  
399 duce *Campylobacter* incidence whilst improving bird health and welfare, to provide the consumer with a better product whilst  
400 reducing the impact of campylobacteriosis on human health.

## BROILER WELFARE AND *CAMPYLOBACTER*

### 401 **Author contributions statement**

402 F.M.C. performed the microbiological sampling. All authors interpreted the results. T.R., M.B.B. and M.S.D. conceived the  
403 study. T.R. built the models and wrote all associated code. T.R. wrote the manuscript. M.S.D., F.M.C., and M.B.B. supervised  
404 the project. All authors reviewed the manuscript.

### 405 **Conflict of interest statement.**

406 The author declares that the research was conducted in the absence of any commercial or financial relationships that could be  
407 construed as a potential conflict of interest.

### 408 **Funding**

409 The work was supported through an Engineering and Physical Sciences Research Council (EPSRC) (<https://epsrc.ukri.org/>)  
410 Systems Biology studentship award (EP/G03706X/1) to T.R. This work was further supported by the Biotechnology and  
411 Biological Science Research Council (BBSRC) as part of the Animal Health and Welfare ERA-net call, (grant numbers  
412 BB/N023803/1, BB/K001388) to M.S.D. The funders had no role in study design, data collection and analysis, decision to  
413 publish, or preparation of the manuscript.

### 414 **References**

- 415 Alhenaky, A., Abdelqader, A., Abuajamieh, M., and Al-Fataftah, A.-R. (2017). The effect of heat stress on intestinal integrity  
416 and salmonella invasion in broiler birds. *Journal of Thermal Biology*, 70:9–14.
- 417 Alpigiani, I., Abrahantes, J. C., Michel, V., Huneau-Salaün, A., Chemaly, M., Keeling, L. J., Gervelmeyer, A., Bacci, C.,  
418 Brindani, F., Bonardi, S., et al. (2017). Associations between animal welfare indicators and *Campylobacter* spp. in broiler  
419 chickens under commercial settings: A case study. *Preventive veterinary medicine*, 147:186–193.
- 420 Babacan, O., Harris, S. A., Pinho, R. M., Hedges, A., Jørgensen, F., and Corry, J. E. (2020). Factors affecting the species of  
421 *Campylobacter* colonizing chickens reared for meat. *Journal of applied microbiology*, 129(4):1071–1078.
- 422 Bhat, H. S. and Kumar, N. (2010). On the derivation of the bayesian information criterion. *School of Natural Sciences*,  
423 *University of California*, 99.
- 424 Bouchaala, L., Masmoudi, A., Gargouri, F., and Rebai, A. (2010). Improving algorithms for structure learning in Bayesian  
425 Networks using a new implicit score. *Expert Systems with Applications*, 37(7):5470–5475.
- 426 Bouckaert, R. R. (1995). *Bayesian belief networks: from construction to inference*. PhD thesis.
- 427 Boyd, Y., Herbert, E. G., Marston, K. L., Jones, M. A., and Barrow, P. A. (2005). Host genes affect intestinal colonisation of  
428 newly hatched chickens by *campylobacter jejuni*. *Immunogenetics*, 57(3):248–253.

BROILER WELFARE AND *CAMPYLOBACTER*

- 429 Bull, S. A., Thomas, A., Humphrey, T., Ellis-Iversen, J., Cook, A. J., Lovell, R., and Jorgensen, F. (2008). Flock health  
430 indicators and *Campylobacter* spp. in commercial housed broilers reared in Great Britain. *Applied and environmental*  
431 *microbiology*, 74(17):5408–5413.
- 432 Burkholder, K., Thompson, K., Einstein, M., Applegate, T., and Patterson, J. (2008). Influence of stressors on normal intestinal  
433 microbiota, intestinal morphology, and susceptibility to *Salmonella enteritidis* colonization in broilers. *Poultry Science*,  
434 87(9):1734–1741.
- 435 Caffrey, N., Agunos, A., Gow, S., Liljebjelke, K., Waldner, C. L., Mainali, C., and Checkley, S. L. (2021). A cross-sectional  
436 study of the prevalence factors associated with fluoroquinolone resistant *Campylobacter jejuni* in broiler flocks in Canada.  
437 *Preventive Veterinary Medicine*, 186:105164.
- 438 Castelo, R. and Siebes, A. (2000). Priors on network structures. Biasing the search for Bayesian networks. *International*  
439 *Journal of Approximate Reasoning*, 24(1):39–57.
- 440 Clark, S., Hansen, G., McLean, P., Bond Jr, P., Wakeman, W., Meadows, R., and Buda, S. (2002). Pododermatitis in turkeys.  
441 *Avian diseases*, 46(4):1038–1044.
- 442 Colles, F. M., Cain, R. J., Nickson, T., Smith, A. L., Roberts, S. J., Maiden, M. C., Lunn, D., and Dawkins, M. S. (2016).  
443 Monitoring chicken flock behaviour provides early warning of infection by human pathogen *Campylobacter*. *Proceedings of*  
444 *the Royal Society B: Biological Sciences*, 283(1822):20152323.
- 445 Colles, F. M., Jones, T. A., McCarthy, N. D., Sheppard, S. K., Cody, A. J., Dingle, K. E., Dawkins, M. S., and Maiden,  
446 M. C. (2008). *Campylobacter* infection of broiler chickens in a free-range environment. *Environmental Microbiology*,  
447 10(8):2042–2050.
- 448 Comin, A., Jeremiasson, A., Kratzer, G., and Keeling, L. (2019). Revealing the structure of the associations between housing  
449 system, facilities, management and welfare of commercial laying hens using Additive Bayesian Networks. *Preventive*  
450 *veterinary medicine*, 164:23–32.
- 451 Connell, S., Meade, K. G., Allan, B., Lloyd, A. T., Downing, T., O’Farrelly, C., and Bradley, D. G. (2013). Genome-wide  
452 association analysis of avian resistance to *campylobacter jejuni* colonization identifies risk locus spanning the *cdh13* gene.  
453 *G3: Genes, Genomes, Genetics*, 3(5):881–890.
- 454 Dawkins, M., Roberts, S., Cain, R., Nickson, T., and Donnelly, C. (2017). Early warning of footpad dermatitis and hockburn in  
455 broiler chicken flocks using optical flow, bodyweight and water consumption. *Veterinary Record*, 180(20):499–499.
- 456 De Jong, I., Hindle, V., Butterworth, A., Engel, B., Ferrari, P., Gunnink, H., Moya, T. P., Tuytens, F., and Van Reenen, C.  
457 (2016). Simplifying the Welfare Quality® assessment protocol for broiler chicken welfare. *Animal*, 10(1):117–127.

BROILER WELFARE AND *CAMPYLOBACTER*

- 458 Djennad, A., Iacono, G. L., Sarran, C., Lane, C., Elson, R., Höser, C., Lake, I. R., Colón-González, F. J., Kovats, S., Semenza,  
459 J. C., et al. (2019). Seasonality and the effects of weather on *Campylobacter* infections. *BMC infectious diseases*, 19(1):1–10.
- 460 Doyle, M. and Roman, D. (1981). Growth and survival of *Campylobacter fetus* subsp. *jejuni* as a function of temperature and  
461 pH. *Journal of Food Protection*, 44(8):596–601.
- 462 EFSA Panel on Biological Hazards (BIOHAZ) (2011). Scientific Opinion on *Campylobacter* in broiler meat production: control  
463 options and performance objectives and/or targets at different stages of the food chain. *EFSA Journal*, 9(4):2105.
- 464 El-Shibiny, A., Scott, A., Timms, A., Metawea, Y., Connerton, P., and Connerton, I. (2009). Application of a group II  
465 *Campylobacter* bacteriophage to reduce strains of *Campylobacter jejuni* and *Campylobacter coli* colonizing broiler chickens.  
466 *Journal of food protection*, 72(4):733–740.
- 467 Evans, S. and Sayers, A. (2000). A longitudinal study of *Campylobacter* infection of broiler flocks in Great Britain. *Preventive*  
468 *Veterinary Medicine*, 46(3):209–223.
- 469 Fayyad, U. and Irani, K. (1993). Multi-interval discretization of continuous-valued attributes for classification learning.
- 470 Fox, J. and Monette, G. (1992). Generalized collinearity diagnostics. *Journal of the American Statistical Association*,  
471 87(417):178–183.
- 472 Fraser, R. W., Williams, N., Powell, L., and Cook, A. (2010). Reducing *Campylobacter* and salmonella infection: two studies of  
473 the economic cost and attitude to adoption of on-farm biosecurity measures. *Zoonoses and Public Health*, 57(7-8):e109–e115.
- 474 Frosth, S., Karlsson-Lindsjö, O., Niazi, A., Fernström, L.-L., and Hansson, I. (2020). Identification of transmission routes of  
475 *Campylobacter* and on-farm measures to reduce *Campylobacter* in chicken. *Pathogens*, 9(5):363.
- 476 Ghareeb, K., Awad, W., Mohnl, M., Schatzmayr, G., and Boehm, J. (2013). Control strategies for *Campylobacter* infection in  
477 poultry production. *World's Poultry Science Journal*, 69(1):57–76.
- 478 Gibbens, J., Pascoe, S., Evans, S., Davies, R., and Sayers, A. (2001). A trial of biosecurity as a means to control *Campylobacter*  
479 infection of broiler chickens. *Preventive veterinary medicine*, 48(2):85–99.
- 480 Gomes, A., Quinteiro-Filho, W., Ribeiro, A., Ferraz-de Paula, V., Pinheiro, M., Baskeville, E., Akamine, A., Astolfi-Ferreira,  
481 C., Ferreira, A., and Palermo-Neto, J. (2014). Overcrowding stress decreases macrophage activity and increases *Salmonella*  
482 *Enteritidis* invasion in broiler chickens. *Avian pathology*, 43(1):82–90.
- 483 Guardia, S., Konsak, B., Combes, S., Levenez, F., Cauquil, L., Guillot, J.-F., Moreau-Vauzelle, C., Lessire, M., Juin, H., and  
484 Gabriel, I. (2011). Effects of stocking density on the growth performance and digestive microbiota of broiler chickens.  
485 *Poultry Science*, 90(9):1878–1889.

BROILER WELFARE AND *CAMPYLOBACTER*

- 486 Hald, B., Skovgård, H., Bang, D. D., Pedersen, K., Dybdahl, J., Jespersen, J. B., and Madsen, M. (2004). Flies and  
487 *Campylobacter* infection of broiler flocks. *Emerging infectious diseases*, 10(8):1490.
- 488 Hald, B., Sommer, H. M., and Skovgård, H. (2007). Use of fly screens to reduce *Campylobacter* spp. introduction in broiler  
489 houses. *Emerging infectious diseases*, 13(12):1951.
- 490 Heckert, R., Estevez, I., Russek-Cohen, E., and Pettit-Riley, R. (2002). Effects of density and perch availability on the immune  
491 status of broilers. *Poultry Science*, 81(4):451–457.
- 492 Hermans, D., Van Deun, K., Messens, W., Martel, A., Van Immerseel, F., Haesebrouck, F., Rasschaert, G., Heyndrickx, M.,  
493 and Pasmans, F. (2011). *Campylobacter* control in poultry by current intervention measures ineffective: urgent need for  
494 intensified fundamental research. *Veterinary Microbiology*, 152(3-4):219–228.
- 495 Hirakawa, R., Nurjanah, S., Furukawa, K., Murai, A., Kikusato, M., Nochi, T., and Toyomizu, M. (2020). Heat stress causes  
496 immune abnormalities via massive damage to effect proliferation and differentiation of lymphocytes in broiler chickens.  
497 *Frontiers in veterinary science*, 7:46.
- 498 Humphery, T., Henley, A., and Lanning, D. (1993). The colonization of broiler chickens with *Campylobacter jejuni*: some  
499 epidemiological investigations. *Epidemiology & Infection*, 110(3):601–607.
- 500 Humphrey, S., Chaloner, G., Kemmett, K., Davidson, N., Williams, N., Kipar, A., Humphrey, T., and Wigley, P. (2014).  
501 *Campylobacter jejuni* is not merely a commensal in commercial broiler chickens and affects bird welfare. *MBio*, 5(4).
- 502 Humphrey, T. (2006). Are happy chickens safer chickens? Poultry welfare and disease susceptibility. *British poultry science*,  
503 47(4):379–391.
- 504 Iannetti, L., Neri, D., Santarelli, G. A., Cotturone, G., Vulpiani, M. P., Salini, R., Antoci, S., Di Serafino, G., Di Giannatale, E.,  
505 Pomilio, F., et al. (2020). Animal welfare and microbiological safety of poultry meat: Impact of different at-farm animal  
506 welfare levels on at-slaughterhouse *Campylobacter* and *Salmonella* contamination. *Food Control*, 109:106921.
- 507 Jorgensen, F., Ellis-Iversen, J., Rushton, S., Bull, S., Harris, S., Bryan, S., Gonzalez, A., and Humphrey, T. (2011). Influence of  
508 season and geography on *Campylobacter jejuni* and *C. coli* subtypes in housed broiler flocks reared in Great Britain. *Applied  
509 and environmental microbiology*, 77(11):3741–3748.
- 510 Jorgensen F, Madden RH, Arnold E, Charlett A, Elviss NC (2015). FSA Project FS241044 - Survey report - A Microbiological  
511 survey of *Campylobacter* contamination in fresh whole UK produced chilled chickens at retail sale (2014-15).
- 512 Kohavi, R. and Sahami, M. (1996). Error-based and entropy-based discretization of continuous features. In *KDD*, pages  
513 114–119.
- 514 Kruschke, J. (2014). *Doing Bayesian data analysis: A tutorial with R, JAGS, and Stan*. Academic Press.

BROILER WELFARE AND *CAMPYLOBACTER*

- 515 Li, X., Swaggerty, C., Kogut, M., Chiang, H., Wang, Y., Genovese, K., He, H., Stern, N., Pevzner, I., and Zhou, H. (2008). The  
516 paternal effect of campylobacter jejuni colonization in ceca in broilers. *Poultry science*, 87(9):1742–1747.
- 517 Louis, V. R., Gillespie, I. A., O'Brien, S. J., Russek-Cohen, E., Pearson, A. D., and Colwell, R. R. (2005). Temperature-driven  
518 *Campylobacter* seasonality in England and Wales. *Applied and Environmental Microbiology*, 71(1):85–92.
- 519 Meerburg, B. G. and Kijlstra, A. (2007). Role of rodents in transmission of Salmonella and Campylobacter. *Journal of the*  
520 *Science of Food and Agriculture*, 87(15):2774–2781.
- 521 Mohamed, M. A. and Hanson, R. (1980). Effect of social stress on Newcastle disease virus (LaSota) infection. *Avian diseases*,  
522 pages 908–915.
- 523 Nagaraj, M., Wilson, C., Hess, J., and Bilgili, S. (2007). Effect of high-protein and all-vegetable diets on the incidence and  
524 severity of pododermatitis in broiler chickens. *Journal of applied poultry research*, 16(3):304–312.
- 525 Nagarajan, R., Scutari, M., and Lèbre, S. (2013). Bayesian networks in r. *Springer*, 122:125–127.
- 526 Nylen, G., Dunstan, F., Palmer, S., Andersson, Y., Bager, F., Cowden, J., Feierl, G., Galloway, Y., Kapperud, G., Megraud, F.,  
527 et al. (2002). The seasonal distribution of campylobacter infection in nine european countries and new zealand. *Epidemiology*  
528 *& Infection*, 128(3):383–390.
- 529 Peh, E., Kittler, S., Reich, F., and Kehrenberg, C. (2020). Antimicrobial activity of organic acids against *Campylobacter* spp.  
530 and development of combinations—A synergistic effect? *Plos one*, 15(9):e0239312.
- 531 Petersen, L., Nielsen, E., and On, S. L. (2001). Serotype and genotype diversity and hatchery transmission of *Campylobacter*  
532 *jejuni* in commercial poultry flocks. *Veterinary microbiology*, 82(2):141–154.
- 533 Psifidi, A., Kranis, A., Rothwell, L. M., Bremner, A., Russell, K., Robledo, D., Bush, S. J., Fife, M., Hocking, P. M., Banos, G.,  
534 et al. (2021). Quantitative trait loci and transcriptome signatures associated with avian heritable resistance to campylobacter.  
535 *Scientific reports*, 11.
- 536 Rawson, T., Dawkins, M. S., and Bonsall, M. B. (2019). A Mathematical Model of *Campylobacter* Dynamics Within a Broiler  
537 Flock. *Frontiers in Microbiology*, 10:1940.
- 538 Rawson, T., Paton, R. S., Colles, F. M., Maiden, M. C., Dawkins, M. S., and Bonsall, M. B. (2020). A Mathematical Modeling  
539 Approach to Uncover Factors Influencing the Spread of *Campylobacter* in a Flock of Broiler-Breeder Chickens. *Frontiers in*  
540 *Microbiology*, 11:2481.
- 541 Rushton, S., Humphrey, T., Shirley, M., Bull, S., and Jørgensen, F. (2009). *Campylobacter* in housed broiler chickens: a  
542 longitudinal study of risk factors. *Epidemiology & Infection*, 137(8):1099–1110.



## BROILER WELFARE AND *CAMPYLOBACTER*

- 543 Saint-Cyr, M. J., Guyard-Nicodème, M., Messaoudi, S., Chemaly, M., Cappelier, J.-M., Dousset, X., and Haddad, N. (2016).  
544 Recent advances in screening of anti-Campylobacter activity in probiotics for use in poultry. *Frontiers in microbiology*,  
545 7:553.
- 546 Scutari, M. (2009). Learning Bayesian networks with the bnlearn R package. *arXiv preprint arXiv:0908.3817*.
- 547 Scutari, M. and Denis, J.-B. (2014). *Bayesian networks: with examples in R*. CRC press.
- 548 Shanawany, M. (1984). Inter-relationship between egg weight, parental age and embryonic development. *British Poultry*  
549 *Science*, 25(4):449–455.
- 550 Sibanda, N., McKenna, A., Richmond, A., Ricke, S. C., Callaway, T., Stratakos, A. C., Gundogdu, O., and Corcionivoschi,  
551 N. (2018). A review of the effect of management practices on campylobacter prevalence in poultry farms. *Frontiers in*  
552 *microbiology*, 9:2002.
- 553 Stern, N. J., Cox, N. A., Musgrove, M. T., and Park, C. (2001). Incidence and levels of Campylobacter in broilers after exposure  
554 to an inoculated seeder bird. *Journal of Applied Poultry Research*, 10(4):315–318.
- 555 Stern, N. J., Meinersmann, R. J., Cox, N. A., Bailey, J. S., and Blankenship, L. C. (1990). Influence of host lineage on cecal  
556 colonization by campylobacter jejuni in chickens. *Avian diseases*, pages 602–606.
- 557 Strachan, N. J. and Forbes, K. J. (2010). The growing UK epidemic of human campylobacteriosis. *The Lancet*, 376(9742):665–  
558 667.
- 559 Tam, C. C. and O'Brien, S. J. (2016). Economic cost of Campylobacter, Norovirus and Rotavirus disease in the United  
560 Kingdom. *PloS one*, 11(2):e0138526.
- 561 Wallace, J., Stanley, K., Currie, J., Diggle, P., and Jones, K. (1997). Seasonality of thermophilic Campylobacter populations in  
562 chickens. *Journal of Applied Microbiology*, 82(2):219–224.
- 563 Westrell, T., Ciampa, N., Boelaert, F., Helwigh, B., Korsgaard, H., Chríel, M., Ammon, A., and Mäkelä, P. (2009). Zoonotic  
564 infections in Europe in 2007: a summary of the EFSA-ECDC annual report. *Eurosurveillance*, 14(3):19100.
- 565 Wigley, P. (2015). Blurred lines: pathogens, commensals, and the healthy gut. *Frontiers in veterinary science*, 2:40.

## 566 **A Appendices**

### 567 **A.1 Appendix 1 - Bayesian Statistics**

568 This brief section aims to convey the basic principles of Bayesian statistics, and familiarise the reader with the terminology that  
569 is be used throughout the manuscript. For an in-depth explanation, we recommend the text by [Kruschke \(2014\)](#).

## BROILER WELFARE AND *CAMPYLOBACTER*

570

571 Bayesian statistics is derived wholly from the relationship defined by Bayes' theorem,

$$P(\theta|D) = \frac{P(D|\theta)P(\theta)}{P(D)}. \quad (2)$$

572 If we consider  $\theta$  as some statistical parameter we wish to infer, and  $D$  as some data informing the parameter, then equation  
573 (1) expresses that the probability distribution for our value of  $\theta$ , given our dataset ( $P(\theta|D)$ ), is proportional to the **likelihood** of  
574 such data ( $P(D|\theta)$ ) multiplied by the probability distribution of  $\theta$  free of any data ( $P(\theta)$ ).

575

576 One starts with a **prior** probabilistic understanding of the values  $\theta$ , often informed by expert opinion, and by utilising  
577 relevant data,  $D$ , we update our belief in the values  $\theta$  may take, producing a new **posterior** distribution. Mnemonically, if  
578 we wished to calculate the probability that a flipped coin will land heads up, we may have a **prior** belief that the coin is fair.  
579 However, upon observing a data set of 5 coin flips, all of which produced heads, we may update our **posterior** belief to reflect  
580 that the coin may be biased.

581

582 The analytical difficulty in this calculation lies in computing  $P(D) = \int P(D|\theta)P(\theta)d\theta$ , which is often near impossible  
583 for realistically complex models. Fortunately modern computing power enables us to efficiently estimate our posterior distribu-  
584 tions through algorithms such as Gibbs sampling and other Metropolis-Hastings schemes.

585

586 Hierarchical systems represent multi-variable models where some parameters depend on other parameters. Returning to  
587 the example of a coin flip, say the probability of heads ( $\theta$ ) is dependent on the factory in which the coin was minted. The  
588 probability that a coin was from a certain factory ( $\omega$ ) will then inform our value of ( $\theta$ ). Expressed mathematically, equation (1)  
589 now becomes:

$$\begin{aligned} P(\theta, \omega|D) &= \frac{P(D|\theta, \omega)P(\theta, \omega)}{P(D)} \\ &= \frac{P(D|\theta, \omega)P(\theta|\omega)P(\omega)}{P(D)}. \end{aligned} \quad (3)$$

590 This means that a prior distribution is only required for  $\omega$ , as this distribution will directly inform our **conditional prior** of  
591  $\theta$ , via our model formulation. As such, when provided with data on coin flips from multiple coins from different factories, we  
592 obtain a posterior probability distribution of which factory a coin has come from, and the resulting probability of a coin flip  
593 resulting in heads. This structure of conditional independence means that data relating specifically to one parameter can still  
594 help inform the posterior of all other dependent variables, a key advantage of Bayesian inference.

BROILER WELFARE AND *CAMPYLOBACTER*

595 **A.2 Appendix 2 - Logistic Regression maximal model to minimal adequate model**

596 First we present the logistic regression analysis of the maximal model:

**Table 7.** Logistic regression analysis of the maximal model.

| Predictor                                            | $\beta$ (Estimate)      | SE $\beta$             | Wald-test $z$ -score | $p$                    | $e^{\beta}$ (odds ratio) |
|------------------------------------------------------|-------------------------|------------------------|----------------------|------------------------|--------------------------|
| (Intercept)                                          | 8.958                   | 7.00                   | 1.28                 | 0.2006                 | NA                       |
| <i>Number placed</i>                                 | $-5.435 \times 10^{-5}$ | $6.928 \times 10^{-5}$ | -0.785               | 0.433                  | 0.999                    |
| <i>Breed</i> (1 = B, 0 = A)                          | -1.510                  | 0.788                  | -1.916               | 0.0554                 | 0.221                    |
| <i>Breed</i> (1 = A & B, 0 = A)                      | -1.213                  | 1.815                  | -0.668               | 0.504                  | 0.297                    |
| <i>Mean parent age</i>                               | 0.0255                  | 0.0406                 | 0.629                | 0.529                  | 1.026                    |
| <i>No. parent flocks</i> (1 = 2 flocks, 0 = 1 flock) | -0.456                  | 0.755                  | -0.604               | 0.546                  | 0.638                    |
| <i>No. parent flocks</i> (1 = 3 flocks, 0 = 1 flock) | -0.930                  | 0.846                  | -1.1                 | 0.271                  | 0.394                    |
| <i>No. parent flocks</i> (1 = 4 flocks, 0 = 1 flock) | -1.372                  | 1.519                  | -0.903               | 0.367                  | 0.254                    |
| <i>28-day mortality percentage</i>                   | -0.339                  | 0.318                  | -1.065               | 0.287                  | 0.713                    |
| <i>Pododermatitis percentage</i>                     | -0.016                  | 0.015                  | -1.142               | 0.253                  | 0.983                    |
| <i>Hock burn percentage</i>                          | -0.0531                 | 0.0240                 | -2.215               | <b>0.0268</b>          | 0.948                    |
| <i>28-day average weight</i>                         | -0.0050                 | 0.0047                 | -1.070               | 0.284                  | 0.995                    |
| <i>Minimum temperature</i>                           | 0.512                   | 0.135                  | 3.809                | <b>0.0001</b>          | 1.669                    |
| Test                                                 |                         |                        | $\chi^2$             | $p$                    |                          |
| Overall model evaluation *                           |                         |                        |                      |                        |                          |
| Likelihood ratio test                                |                         |                        | 43.748               | $1.685 \times 10^{-5}$ |                          |
| Goodness of fit test                                 |                         |                        |                      |                        |                          |
| Hosmer-Lemeshow                                      |                         |                        | 7.9779               | 0.436                  |                          |
| McFadden's $R^2$                                     | 0.376                   |                        |                      |                        |                          |
| Cox & Snell's $R^2$                                  | 0.406                   |                        |                      |                        |                          |

\* Compared against null model.

597

BROILER WELFARE AND *CAMPYLOBACTER*

598 We then iteratively remove the least significant variables, until only significant variables remain. Firstly we remove *Mean*  
 599 *parent age*.

**Table 8.** Logistic regression analysis of the maximal model with *Mean parent age* removed.

| Predictor                                            | $\beta$ (Estimate)      | SE $\beta$             | Wald-test z-score | <i>p</i>               |
|------------------------------------------------------|-------------------------|------------------------|-------------------|------------------------|
| (Intercept)                                          | 8.887                   | 6.863                  | 1.295             | 0.195                  |
| <i>Number placed</i>                                 | $-7.137 \times 10^{-5}$ | $6.412 \times 10^{-5}$ | -1.113            | 0.195                  |
| <i>Breed</i> (1 = B, 0 = A)                          | -1.382                  | 0.755                  | -1.832            | 0.067                  |
| <i>Breed</i> (1 = A & B, 0 = A)                      | -1.155                  | 1.806                  | -0.639            | 0.523                  |
| <i>No. parent flocks</i> (1 = 2 flocks, 0 = 1 flock) | -0.461                  | 0.749                  | -0.616            | 0.538                  |
| <i>No. parent flocks</i> (1 = 3 flocks, 0 = 1 flock) | -0.973                  | 0.850                  | -1.144            | 0.253                  |
| <i>No. parent flocks</i> (1 = 4 flocks, 0 = 1 flock) | -1.426                  | 1.556                  | -0.916            | 0.360                  |
| <i>28-day mortality percentage</i>                   | -0.392                  | 0.312                  | -1.257            | 0.209                  |
| <i>Pododermatitis percentage</i>                     | -0.017                  | 0.015                  | -1.160            | 0.246                  |
| <i>Hock burn percentage</i>                          | -0.0527                 | 0.0239                 | -2.201            | <b>0.0277</b>          |
| <i>28-day average weight</i>                         | -0.0038                 | 0.0041                 | -0.917            | 0.359                  |
| <i>Minimum temperature</i>                           | 0.497                   | 0.128                  | 3.883             | <b>0.0001</b>          |
| Test                                                 |                         |                        | $\chi^2$          | <i>p</i>               |
| Overall model evaluation                             |                         |                        |                   |                        |
| Likelihood ratio test <sup>1</sup>                   |                         |                        | 47.16             | $2.014 \times 10^{-6}$ |
| Likelihood ratio test <sup>2</sup>                   |                         |                        | 0.4033            | 0.5254                 |
| Goodness of fit test                                 |                         |                        |                   |                        |
| Hosmer-Lemeshow                                      |                         |                        | 11.131            | 0.1944                 |
| McFadden's $R^2$                                     | 0.372                   |                        |                   |                        |
| Cox & Snell's $R^2$                                  | 0.403                   |                        |                   |                        |

<sup>1</sup> Compared against null model.

<sup>2</sup> Compared against maximal model.

BROILER WELFARE AND *CAMPYLOBACTER*

601 Next we remove *Number of parent flocks*.

**Table 9.** Logistic regression analysis of the maximal model with *Number of parent flocks* removed.

| Predictor                          | $\beta$ (Estimate)      | SE $\beta$             | Wald-test z-score | <i>p</i>               |
|------------------------------------|-------------------------|------------------------|-------------------|------------------------|
| (Intercept)                        | 10.63                   | 6.715                  | 1.583             | 0.113                  |
| <i>Number placed</i>               | $-8.973 \times 10^{-5}$ | $6.650 \times 10^{-5}$ | -1.349            | 0.1773                 |
| <i>Breed</i> (1 = B, 0 = A)        | -1.542                  | 0.744                  | -2.072            | <b>0.0382</b>          |
| <i>Breed</i> (1 = A & B, 0 = A)    | -1.408                  | 1.602                  | -0.879            | 0.3794                 |
| <i>28-day mortality percentage</i> | -0.383                  | 0.289                  | -1.325            | 0.185                  |
| <i>Pododermatitis percentage</i>   | -0.017                  | 0.014                  | -1.248            | 0.212                  |
| <i>Hock burn percentage</i>        | -0.0477                 | 0.0237                 | -2.013            | <b>0.044</b>           |
| <i>28-day average weight</i>       | -0.0050                 | 0.0039                 | -1.265            | 0.2058                 |
| <i>Minimum temperature</i>         | 0.506                   | 0.130                  | 3.893             | <b>0.0001</b>          |
| Test                               |                         |                        | $\chi^2$          | <i>p</i>               |
| Overall model evaluation           |                         |                        |                   |                        |
| Likelihood ratio test <sup>1</sup> |                         |                        | 41.44             | $1.728 \times 10^{-6}$ |
| Likelihood ratio test <sup>2</sup> |                         |                        | 2.314             | 0.678                  |
| Goodness of fit test               |                         |                        |                   |                        |
| Hosmer-Lemeshow                    |                         |                        | 27.57             | 0.0005                 |
| McFadden's $R^2$                   | 0.356                   |                        |                   |                        |
| Cox & Snell's $R^2$                | 0.389                   |                        |                   |                        |

<sup>1</sup> Compared against null model.

<sup>2</sup> Compared against maximal model.

602

BROILER WELFARE AND *CAMPYLOBACTER*

603 Next we remove *Pododermatitis* percentage.

**Table 10.** Logistic regression analysis of the maximal model with *Pododermatitis* percentage removed.

| Predictor                          | $\beta$ (Estimate)     | SE $\beta$             | Wald-test z-score | <i>p</i>               |
|------------------------------------|------------------------|------------------------|-------------------|------------------------|
| (Intercept)                        | 8.086                  | 6.309                  | 1.282             | 0.200                  |
| <i>Number placed</i>               | $-6.77 \times 10^{-5}$ | $6.029 \times 10^{-5}$ | -1.123            | 0.2615                 |
| <i>Breed</i> (1 = B, 0 = A)        | -1.501                 | 0.735                  | -2.043            | <b>0.0410</b>          |
| <i>Breed</i> (1 = A & B, 0 = A)    | -0.647                 | 1.456                  | -0.444            | 0.657                  |
| <i>28-day mortality percentage</i> | -0.366                 | 0.283                  | -1.295            | 0.195                  |
| <i>Hock burn percentage</i>        | -0.0519                | 0.0228                 | -2.283            | <b>0.0224</b>          |
| <i>28-day average weight</i>       | -0.0046                | 0.0038                 | -1.186            | 0.2356                 |
| <i>Minimum temperature</i>         | 0.540                  | 0.129                  | 4.192             | <b>0.00003</b>         |
| Test                               |                        |                        | $\chi^2$          | <i>p</i>               |
| Overall model evaluation           |                        |                        |                   |                        |
| Likelihood ratio test <sup>1</sup> |                        |                        | 39.76             | $1.398 \times 10^{-6}$ |
| Likelihood ratio test <sup>2</sup> |                        |                        | 3.986             | 0.551                  |
| Goodness of fit test               |                        |                        |                   |                        |
| Hosmer-Lemeshow                    |                        |                        | 25.464            | 0.00130                |
| McFadden's $R^2$                   | 0.341                  |                        |                   |                        |
| Cox & Snell's $R^2$                | 0.377                  |                        |                   |                        |

<sup>1</sup> Compared against null model.

<sup>2</sup> Compared against maximal model.

604

BROILER WELFARE AND *CAMPYLOBACTER*

605

Next we remove *Number placed*.

**Table 11.** Logistic regression analysis of the maximal model with *Number placed* removed.

| Predictor                          | $\beta$ (Estimate) | SE $\beta$ | Wald-test z-score | <i>p</i>               |
|------------------------------------|--------------------|------------|-------------------|------------------------|
| (Intercept)                        | 4.983              | 5.434      | 0.917             | 0.359                  |
| <i>Breed</i> (1 = B, 0 = A)        | -1.825             | 0.697      | -2.617            | <b>0.0089</b>          |
| <i>Breed</i> (1 = A & B, 0 = A)    | -1.267             | 1.358      | -0.933            | 0.351                  |
| <i>28-day mortality percentage</i> | -0.228             | 0.238      | -0.956            | 0.339                  |
| <i>Hock burn percentage</i>        | -0.0513            | 0.0211     | -2.435            | <b>0.0149</b>          |
| <i>28-day average weight</i>       | -0.0037            | 0.0037     | -1.016            | 0.310                  |
| <i>Minimum temperature</i>         | 0.491              | 0.113      | 4.341             | <b>0.00001</b>         |
| Test                               |                    |            | $\chi^2$          | <i>p</i>               |
| Overall model evaluation           |                    |            |                   |                        |
| Likelihood ratio test <sup>1</sup> |                    |            | 38.512            | $8.921 \times 10^{-7}$ |
| Likelihood ratio test <sup>2</sup> |                    |            | 5.237             | 0.514                  |
| Goodness of fit test               |                    |            |                   |                        |
| Hosmer-Lemeshow                    |                    |            | 22.82             | 0.0036                 |
| McFadden's $R^2$                   | 0.331              |            |                   |                        |
| Cox & Snell's $R^2$                | 0.368              |            |                   |                        |

<sup>1</sup> Compared against null model.

<sup>2</sup> Compared against maximal model.

606



BROILER WELFARE AND *CAMPYLOBACTER*

607

Next we remove 28-day mortality percentage.

**Table 12.** Logistic regression analysis of the maximal model with 28-day mortality percentage removed.

| Predictor                          | $\beta$ (Estimate) | SE $\beta$ | Wald-test z-score | <i>p</i>               |
|------------------------------------|--------------------|------------|-------------------|------------------------|
| (Intercept)                        | 3.835              | 5.266      | 0.728             | 0.466                  |
| <i>Breed</i> (1 = B, 0 = A)        | -1.639             | 0.652      | -2.513            | <b>0.0120</b>          |
| <i>Breed</i> (1 = A & B, 0 = A)    | -1.133             | 1.406      | -0.806            | 0.420                  |
| <i>Hock burn percentage</i>        | -0.045             | 0.019      | -2.33             | <b>0.0197</b>          |
| <i>28-day average weight</i>       | -0.0036            | 0.0037     | -0.978            | 0.328                  |
| <i>Minimum temperature</i>         | 0.471              | 0.108      | 4.344             | <b>0.00001</b>         |
| Test                               |                    |            | $\chi^2$          | <i>p</i>               |
| Overall model evaluation           |                    |            |                   |                        |
| Likelihood ratio test <sup>1</sup> |                    |            | 37.59             | $4.553 \times 10^{-7}$ |
| Likelihood ratio test <sup>2</sup> |                    |            | 6.155             | 0.522                  |
| Goodness of fit test               |                    |            |                   |                        |
| Hosmer-Lemeshow                    |                    |            | 23.16             | 0.0032                 |
| McFadden's $R^2$                   | 0.323              |            |                   |                        |
| Cox & Snell's $R^2$                | 0.361              |            |                   |                        |

<sup>1</sup> Compared against null model.

<sup>2</sup> Compared against maximal model.

608

BROILER WELFARE AND *CAMPYLOBACTER*

609 Next we remove 28-day average weight.

**Table 13.** Logistic regression analysis of the maximal model with 28-day average weight removed.

| Predictor                          | $\beta$ (Estimate) | SE $\beta$ | Wald-test z-score | <i>p</i>               |
|------------------------------------|--------------------|------------|-------------------|------------------------|
| (Intercept)                        | -1.29              | 0.669      | -1.935            | 0.0529                 |
| <i>Breed</i> (1 = B, 0 = A)        | -1.596             | 0.650      | -2.455            | <b>0.0141</b>          |
| <i>Breed</i> (1 = A & B, 0 = A)    | -1.030             | 1.341      | -0.768            | 0.443                  |
| <i>Hock burn percentage</i>        | -0.043             | 0.019      | -2.238            | <b>0.0252</b>          |
| <i>Minimum temperature</i>         | 0.464              | 0.106      | 4.382             | <b>0.00001</b>         |
| Test                               |                    |            | $\chi^2$          | <i>p</i>               |
| Overall model evaluation           |                    |            |                   |                        |
| Likelihood ratio test <sup>1</sup> |                    |            | 36.611            | $2.166 \times 10^{-7}$ |
| Likelihood ratio test <sup>2</sup> |                    |            | 7.137             | 0.5219                 |
| Goodness of fit test               |                    |            |                   |                        |
| Hosmer-Lemeshow                    |                    |            | 16.699            | 0.033                  |
| McFadden's $R^2$                   | 0.314              |            |                   |                        |
| Cox & Snell's $R^2$                | 0.353              |            |                   |                        |

<sup>1</sup> Compared against null model.

<sup>2</sup> Compared against maximal model.

610

611

612 The only remaining non-significant variable remains within the *Breed* variable. Table 13 shows that the factor 'Breed A &  
 613 B' is not statistically significantly different in its predictive potential from Breed A birds. As such, we collapse the 'Breed A'  
 614 and 'Breed A & B' factors together, to produce the final minimal adequate model as provided in Table 4 of the manuscript.

BROILER WELFARE AND *CAMPYLOBACTER*

615 **A.3 Appendix 3 - Bayesian network structure with BDE scoring**

616 Here we present the best-fit network structure when the hill-climbing algorithm is used with BDE scoring instead of BIC  
 617 scoring.

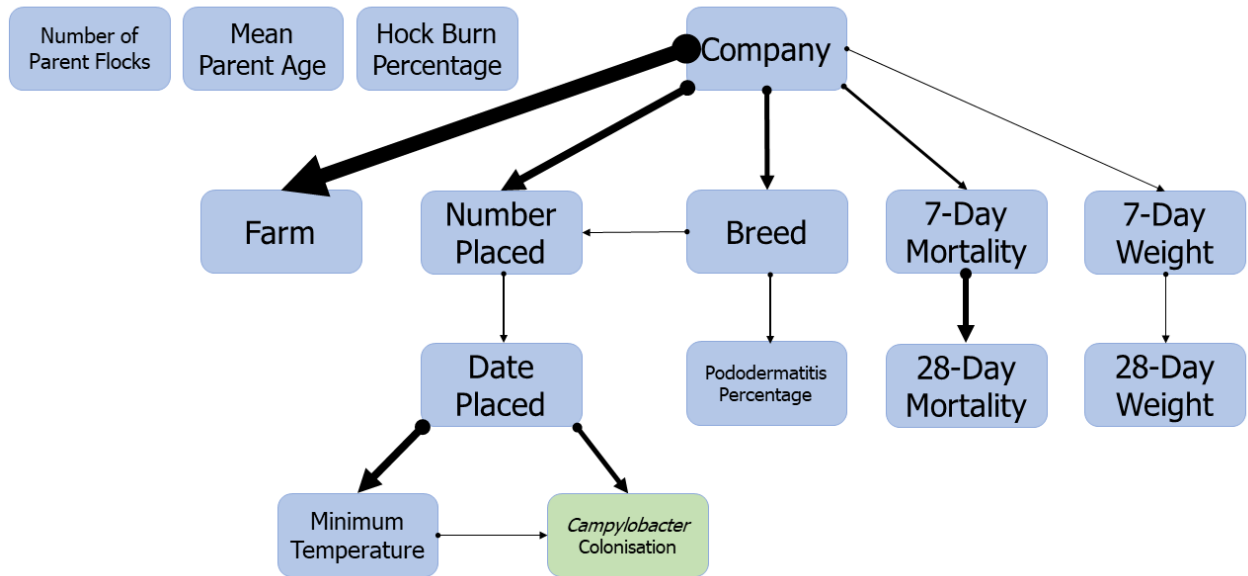

**Figure 3.** Bayesian network structure showing the interrelationships between multiple welfare and rearing practise factors in a flock of broilers. *Campylobacter* colonization is directly impacted by the season the flock is grown in. Structure was learned using a hill-climbing algorithm, and sampled networks scored using the Bayesian Dirichlet equivalent score (BDE). Arrow-width indicates arc strength as scored by BDE.

We provide the exact arc strengths as scored by BDE below.

**Table 14.** Arc strengths of the Bayesian network shown in Figure A.2.1. Arc strength is measured by Bayesian Dirichlet equivalent score (BDE), where a lower value indicators a stronger link.

| Parent                     | Child                             | Arc Strength |
|----------------------------|-----------------------------------|--------------|
| Company                    | Farm                              | -52.501334   |
| Company                    | Number placed                     | -28.237221   |
| Date placed                | Minimum temperature               | -31.034381   |
| 7-day Mortality Percentage | 28-day Mortality Percentage       | -20.568572   |
| Company                    | Breed                             | -17.193869   |
| Date placed                | <i>Campylobacter</i> colonization | -18.176669   |
| Company                    | 7-day Mortality Percentage        | -11.413902   |
| Number placed              | Date placed                       | -5.470563    |
| Minimum temperature        | <i>Campylobacter</i> colonization | -4.876092    |
| Breed                      | Number placed                     | -4.271554    |
| 7-day average weight       | 28-day average weight             | -3.898640    |
| Breed                      | Pododermatitis percentage         | -2.886749    |
| Company                    | 7-day average weight              | -2.621290    |

BROILER WELFARE AND *CAMPYLOBACTER*

619 **A.4 Appendix 4 - *Campylobacter* conditional probability tables**

620 The network structure shown in Figure 2 displays that the date placed alone captures the probabilistic distribution of whether  
621 or not a flock is colonized by *Campylobacter*. However, in the absence of data on the date placed, other predictor variables  
622 can inform our expectations of whether or not a flock will be *Campylobacter* positive. The following tables provide these  
623 conditional probabilities for *Campylobacter* colonization under the assumption that no data is known other than the variable  
624 displayed. The best fit parameters via both Bayesian inference and MLE are given. The Bayesian estimates are built from a  
625 larger dataset of 114 entries, 33 of which contain some missing data. We do not provide tables upon mean parent age or number  
626 of parent flocks, as these variables were found to be unassociated.

**Table 15.** Conditional probability table for *Campylobacter* colonization status, when data is only available on the Company variable. We present values calculated by Bayesian inference using uniform priors, and an equivalent sample size of 10. Below that we present values calculated via a maximum likelihood estimator.

| Bayesian Inference                |         |       |
|-----------------------------------|---------|-------|
|                                   | Company |       |
| <i>Campylobacter</i> colonization | 1       | 2     |
| Negative                          | 0.508   | 0.379 |
| Positive                          | 0.492   | 0.621 |

  

| Maximum Likelihood Estimator      |         |       |
|-----------------------------------|---------|-------|
|                                   | Company |       |
| <i>Campylobacter</i> colonization | 1       | 2     |
| Negative                          | 0.576   | 0.430 |
| Positive                          | 0.424   | 0.570 |

BROILER WELFARE AND *CAMPYLOBACTER*

**Table 16.** Conditional probability table for *Campylobacter* colonization status, when data is only available on the Farm variable. We present values calculated by Bayesian inference using uniform priors, and an equivalent sample size of 10. Below that we present values calculated via a maximum likelihood estimator.

| Bayesian Inference                |       |       |       |       |
|-----------------------------------|-------|-------|-------|-------|
|                                   | Farm  |       |       |       |
| <i>Campylobacter</i> colonization | C1F1  | C2F1  | C2F2  | C2F3  |
| Negative                          | 0.505 | 0.386 | 0.387 | 0.388 |
| Positive                          | 0.495 | 0.614 | 0.613 | 0.612 |

  

| Maximum Likelihood Estimator      |       |       |       |       |
|-----------------------------------|-------|-------|-------|-------|
|                                   | Farm  |       |       |       |
| <i>Campylobacter</i> colonization | C1F1  | C2F1  | C2F2  | C2F3  |
| Negative                          | 0.576 | 0.430 | 0.430 | 0.430 |
| Positive                          | 0.424 | 0.570 | 0.570 | 0.570 |

**Table 17.** Conditional probability table for *Campylobacter* colonization status, when data is only available on the ‘number placed’ variable. We present values calculated by Bayesian inference using uniform priors, and an equivalent sample size of 10. Below that we present values calculated via a maximum likelihood estimator.

| Bayesian Inference                |               |                 |                 |
|-----------------------------------|---------------|-----------------|-----------------|
|                                   | Number placed |                 |                 |
| <i>Campylobacter</i> colonization | [11770,22000] | (22000,33503.3] | (33503.3,34650] |
| Negative                          | 0.362         | 0.533           | 0.533           |
| Positive                          | 0.638         | 0.467           | 0.467           |

  

| Maximum Likelihood Estimator      |               |                 |                 |
|-----------------------------------|---------------|-----------------|-----------------|
|                                   | Number placed |                 |                 |
| <i>Campylobacter</i> colonization | [11770,22000] | (22000,33503.3] | (33503.3,34650] |
| Negative                          | 0.417         | 0.616           | 0.544           |
| Positive                          | 0.583         | 0.384           | 0.456           |

BROILER WELFARE AND *CAMPYLOBACTER*

**Table 18.** Conditional probability table for *Campylobacter* colonization status, when data is only available on the breed variable. We present values calculated by Bayesian inference using uniform priors, and an equivalent sample size of 10. Below that we present values calculated via a maximum likelihood estimator.

| Bayesian Inference                |       |       |       |
|-----------------------------------|-------|-------|-------|
|                                   | Breed |       |       |
| <i>Campylobacter</i> colonization | B     | A     | A & B |
| Negative                          | 0.471 | 0.410 | 0.479 |
| Positive                          | 0.529 | 0.590 | 0.521 |

  

| Maximum Likelihood Estimator      |       |       |       |
|-----------------------------------|-------|-------|-------|
|                                   | Breed |       |       |
| <i>Campylobacter</i> colonization | B     | A     | A & B |
| Negative                          | 0.555 | 0.454 | 0.576 |
| Positive                          | 0.445 | 0.546 | 0.424 |

**Table 19.** Conditional probability table for *Campylobacter* colonization status, when data is only available on the 7-day mortality variable. We present values calculated by Bayesian inference using uniform priors, and an equivalent sample size of 10. Below that we present values calculated via a maximum likelihood estimator.

| Bayesian Inference                |                            |             |             |
|-----------------------------------|----------------------------|-------------|-------------|
|                                   | 7-Day Mortality Percentage |             |             |
| <i>Campylobacter</i> colonization | [0.65,1.21]                | (1.21,1.81] | (1.81,7.26] |
| Negative                          | 0.496                      | 0.444       | 0.406       |
| Positive                          | 0.504                      | 0.556       | 0.594       |

  

| Maximum Likelihood Estimator      |                            |             |             |
|-----------------------------------|----------------------------|-------------|-------------|
|                                   | 7-Day Mortality Percentage |             |             |
| <i>Campylobacter</i> colonization | [0.65,1.21]                | (1.21,1.81] | (1.81,7.26] |
| Negative                          | 0.571                      | 0.517       | 0.468       |
| Positive                          | 0.429                      | 0.483       | 0.532       |

BROILER WELFARE AND *CAMPYLOBACTER*

**Table 20.** Conditional probability table for *Campylobacter* colonization status, when data is only available on the 28-day mortality variable. We present values calculated by Bayesian inference using uniform priors, and an equivalent sample size of 10. Below that we present values calculated via a maximum likelihood estimator.

| Bayesian Inference                |                |                   |                |
|-----------------------------------|----------------|-------------------|----------------|
| 28-Day Mortality Percentage       |                |                   |                |
| <i>Campylobacter</i> colonization | [1.97,3.06667] | (3.06667,4.05667] | (4.05667,9.61] |
| Negative                          | 0.480          | 0.445             | 0.419          |
| Positive                          | 0.520          | 0.555             | 0.581          |

  

| Maximum Likelihood Estimator      |                |                   |                |
|-----------------------------------|----------------|-------------------|----------------|
| 28-Day Mortality Percentage       |                |                   |                |
| <i>Campylobacter</i> colonization | [1.97,3.06667] | (3.06667,4.05667] | (4.05667,9.61] |
| Negative                          | 0.557          | 0.518             | 0.481          |
| Positive                          | 0.443          | 0.482             | 0.519          |

**Table 21.** Conditional probability table for *Campylobacter* colonization status, when data is only available on the 7-day weight variable. We present values calculated by Bayesian inference using uniform priors, and an equivalent sample size of 10. Below that we present values calculated via a maximum likelihood estimator.

| Bayesian Inference                |               |               |           |
|-----------------------------------|---------------|---------------|-----------|
| 7-Day Average Weight              |               |               |           |
| <i>Campylobacter</i> colonization | [144,170.667] | (170.667,181] | (181,213] |
| Negative                          | 0.481         | 0.453         | 0.418     |
| Positive                          | 0.519         | 0.547         | 0.582     |

  

| Maximum Likelihood Estimator      |               |               |           |
|-----------------------------------|---------------|---------------|-----------|
| 7-Day Average Weight              |               |               |           |
| <i>Campylobacter</i> colonization | [144,170.667] | (170.667,181] | (181,213] |
| Negative                          | 0.555         | 0.522         | 0.479     |
| Positive                          | 0.445         | 0.478         | 0.521     |



BROILER WELFARE AND *CAMPYLOBACTER*

**Table 22.** Conditional probability table for *Campylobacter* colonization status, when data is only available on the 28-day weight variable. We present values calculated by Bayesian inference using uniform priors, and an equivalent sample size of 10. Below that we present values calculated via a maximum likelihood estimator.

| Bayesian Inference                |                |                   |                |
|-----------------------------------|----------------|-------------------|----------------|
| 28-Day Average Weight             |                |                   |                |
| <i>Campylobacter</i> colonization | [1138,1388.33] | (1388.33,1475.33] | (1475.33,1565] |
| Negative                          | 0.459          | 0.451             | 0.433          |
| Positive                          | 0.541          | 0.549             | 0.567          |

  

| Maximum Likelihood Estimator      |                |                   |                |
|-----------------------------------|----------------|-------------------|----------------|
| 28-Day Average Weight             |                |                   |                |
| <i>Campylobacter</i> colonization | [1138,1388.33] | (1388.33,1475.33] | (1475.33,1565] |
| Negative                          | 0.538          | 0.522             | 0.496          |
| Positive                          | 0.462          | 0.478             | 0.504          |

**Table 23.** Conditional probability table for *Campylobacter* colonization status, when data is only available on the hock burn percentage variable. We present values calculated by Bayesian inference using uniform priors, and an equivalent sample size of 10. Below that we present values calculated via a maximum likelihood estimator.

| Bayesian Inference                |        |         |         |
|-----------------------------------|--------|---------|---------|
| Hock Burn Percentage              |        |         |         |
| <i>Campylobacter</i> colonization | [0,10] | (10,20] | (20,90] |
| Negative                          | 0.438  | 0.447   | 0.452   |
| Positive                          | 0.562  | 0.553   | 0.548   |

  

| Maximum Likelihood Estimator      |        |         |         |
|-----------------------------------|--------|---------|---------|
| Hock Burn Percentage              |        |         |         |
| <i>Campylobacter</i> colonization | [0,10] | (10,20] | (20,90] |
| Negative                          | 0.490  | 0.520   | 0.548   |
| Positive                          | 0.510  | 0.480   | 0.452   |

BROILER WELFARE AND *CAMPYLOBACTER*

**Table 24.** Conditional probability table for *Campylobacter* colonization status, when data is only available on the pododermatitis percentage variable. We present values calculated by Bayesian inference using uniform priors, and an equivalent sample size of 10. Below that we present values calculated via a maximum likelihood estimator.

| Bayesian Inference                |             |              |         |
|-----------------------------------|-------------|--------------|---------|
| <b>Pododermatitis Percentage</b>  |             |              |         |
| <i>Campylobacter</i> colonization | [1,42.6667] | (42.6667,76] | (76,95] |
| Negative                          | 0.448       | 0.457        | 0.436   |
| Positive                          | 0.552       | 0.543        | 0.564   |

  

| Maximum Likelihood Estimator      |             |              |         |
|-----------------------------------|-------------|--------------|---------|
| <b>Pododermatitis Percentage</b>  |             |              |         |
| <i>Campylobacter</i> colonization | [1,42.6667] | (42.6667,76] | (76,95] |
| Negative                          | 0.524       | 0.537        | 0.490   |
| Positive                          | 0.476       | 0.463        | 0.510   |

**Table 25.** Conditional probability table for *Campylobacter* colonization status, when data is only available on the minimum temperature variable. We present values calculated by Bayesian inference using uniform priors, and an equivalent sample size of 10. Below that we present values calculated via a maximum likelihood estimator.

| Bayesian Inference                |         |         |            |
|-----------------------------------|---------|---------|------------|
| <b>Minimum Temperature</b>        |         |         |            |
| <i>Campylobacter</i> colonization | [1.3,4] | (4,8.7] | (8.7,13.8] |
| Negative                          | 0.452   | 0.442   | 0.416      |
| Positive                          | 0.548   | 0.558   | 0.584      |

  

| Maximum Likelihood Estimator      |         |         |            |
|-----------------------------------|---------|---------|------------|
| <b>Minimum Temperature</b>        |         |         |            |
| <i>Campylobacter</i> colonization | [1.3,4] | (4,8.7] | (8.7,13.8] |
| Negative                          | 0.694   | 0.465   | 0.313      |
| Positive                          | 0.306   | 0.535   | 0.687      |

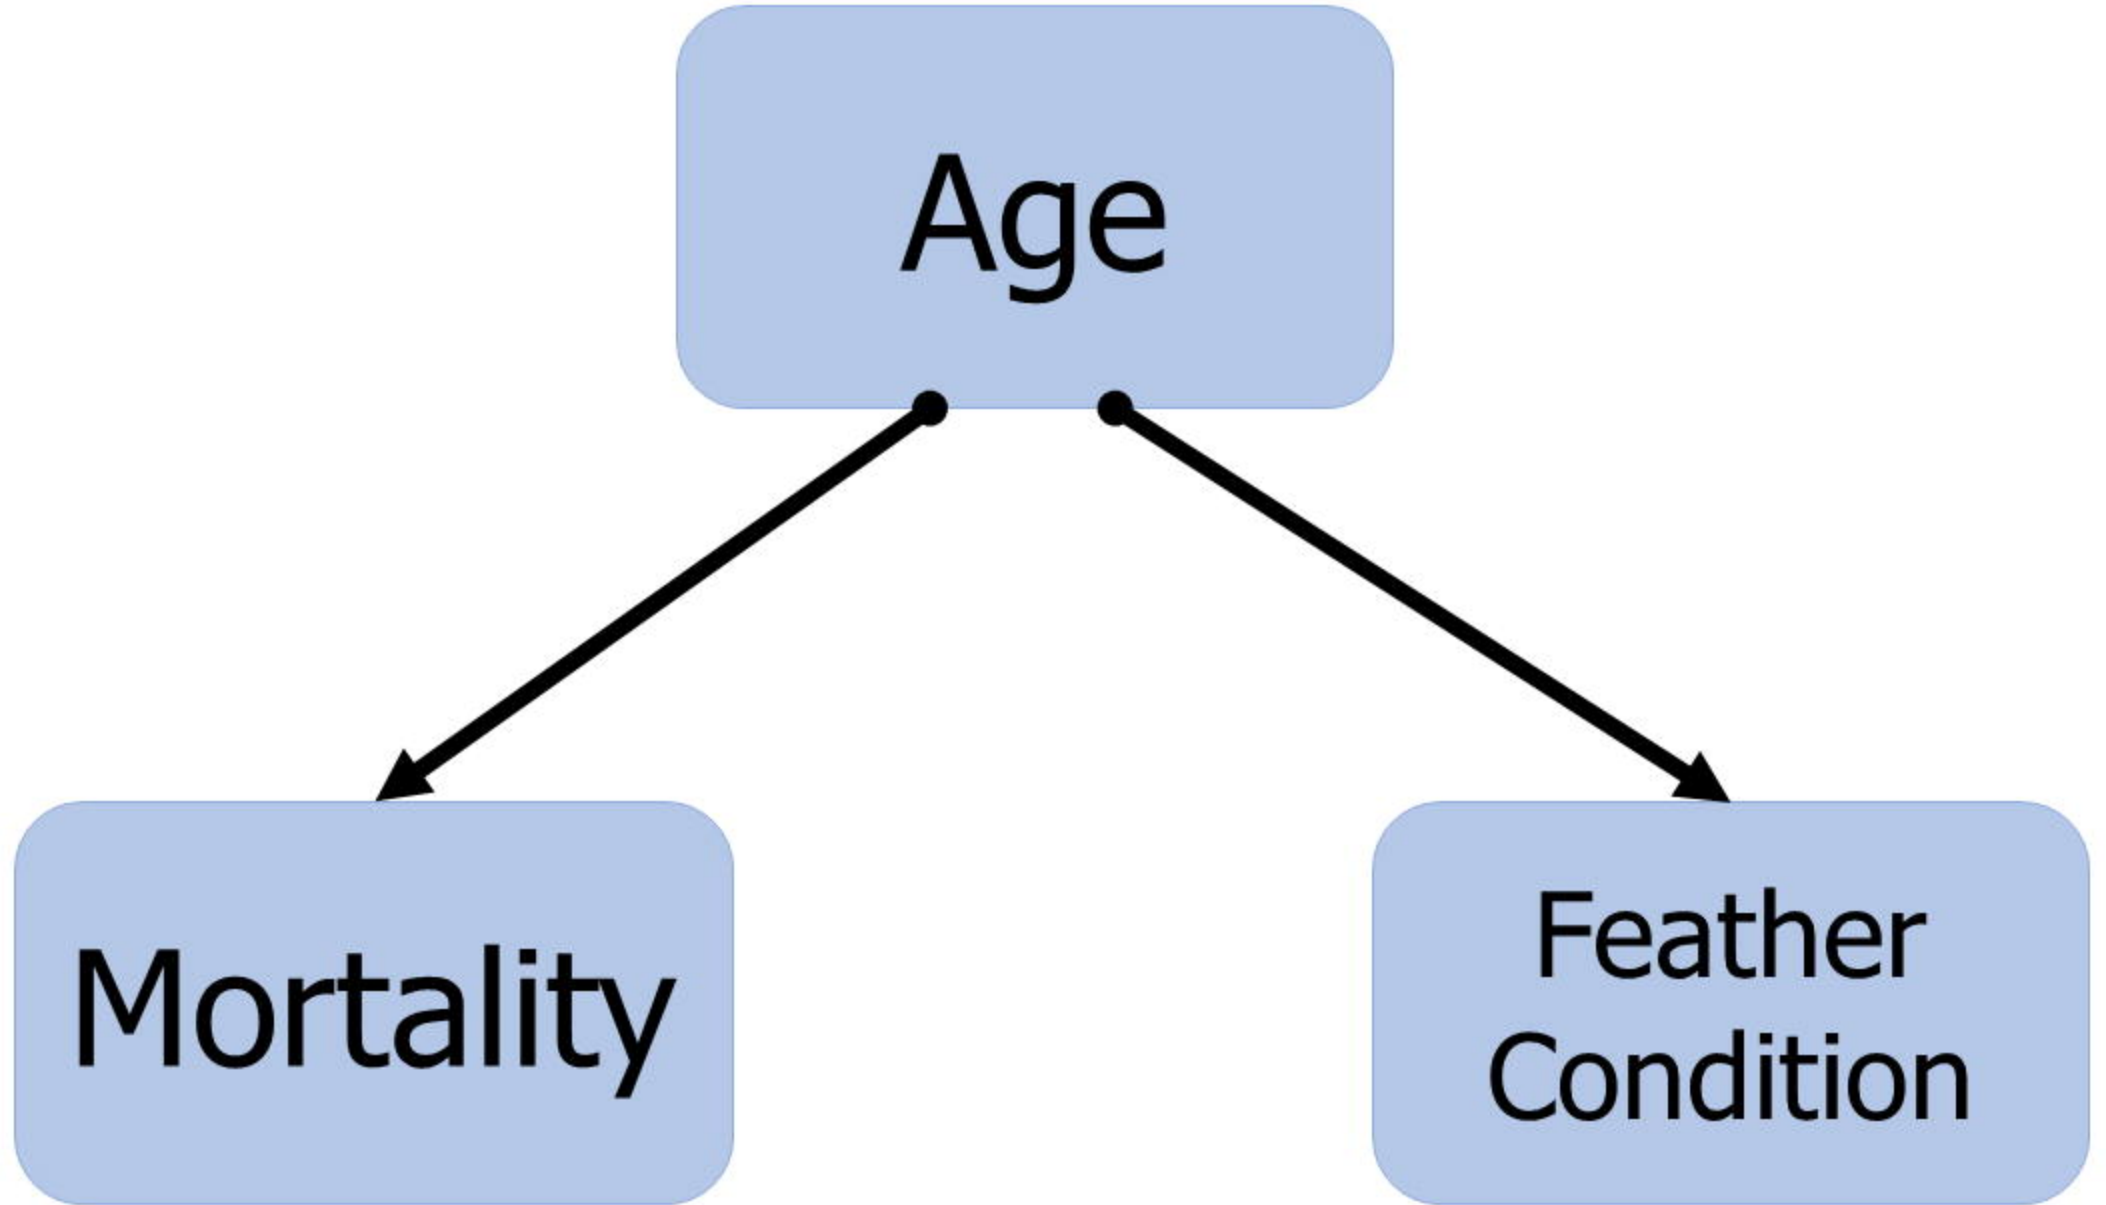

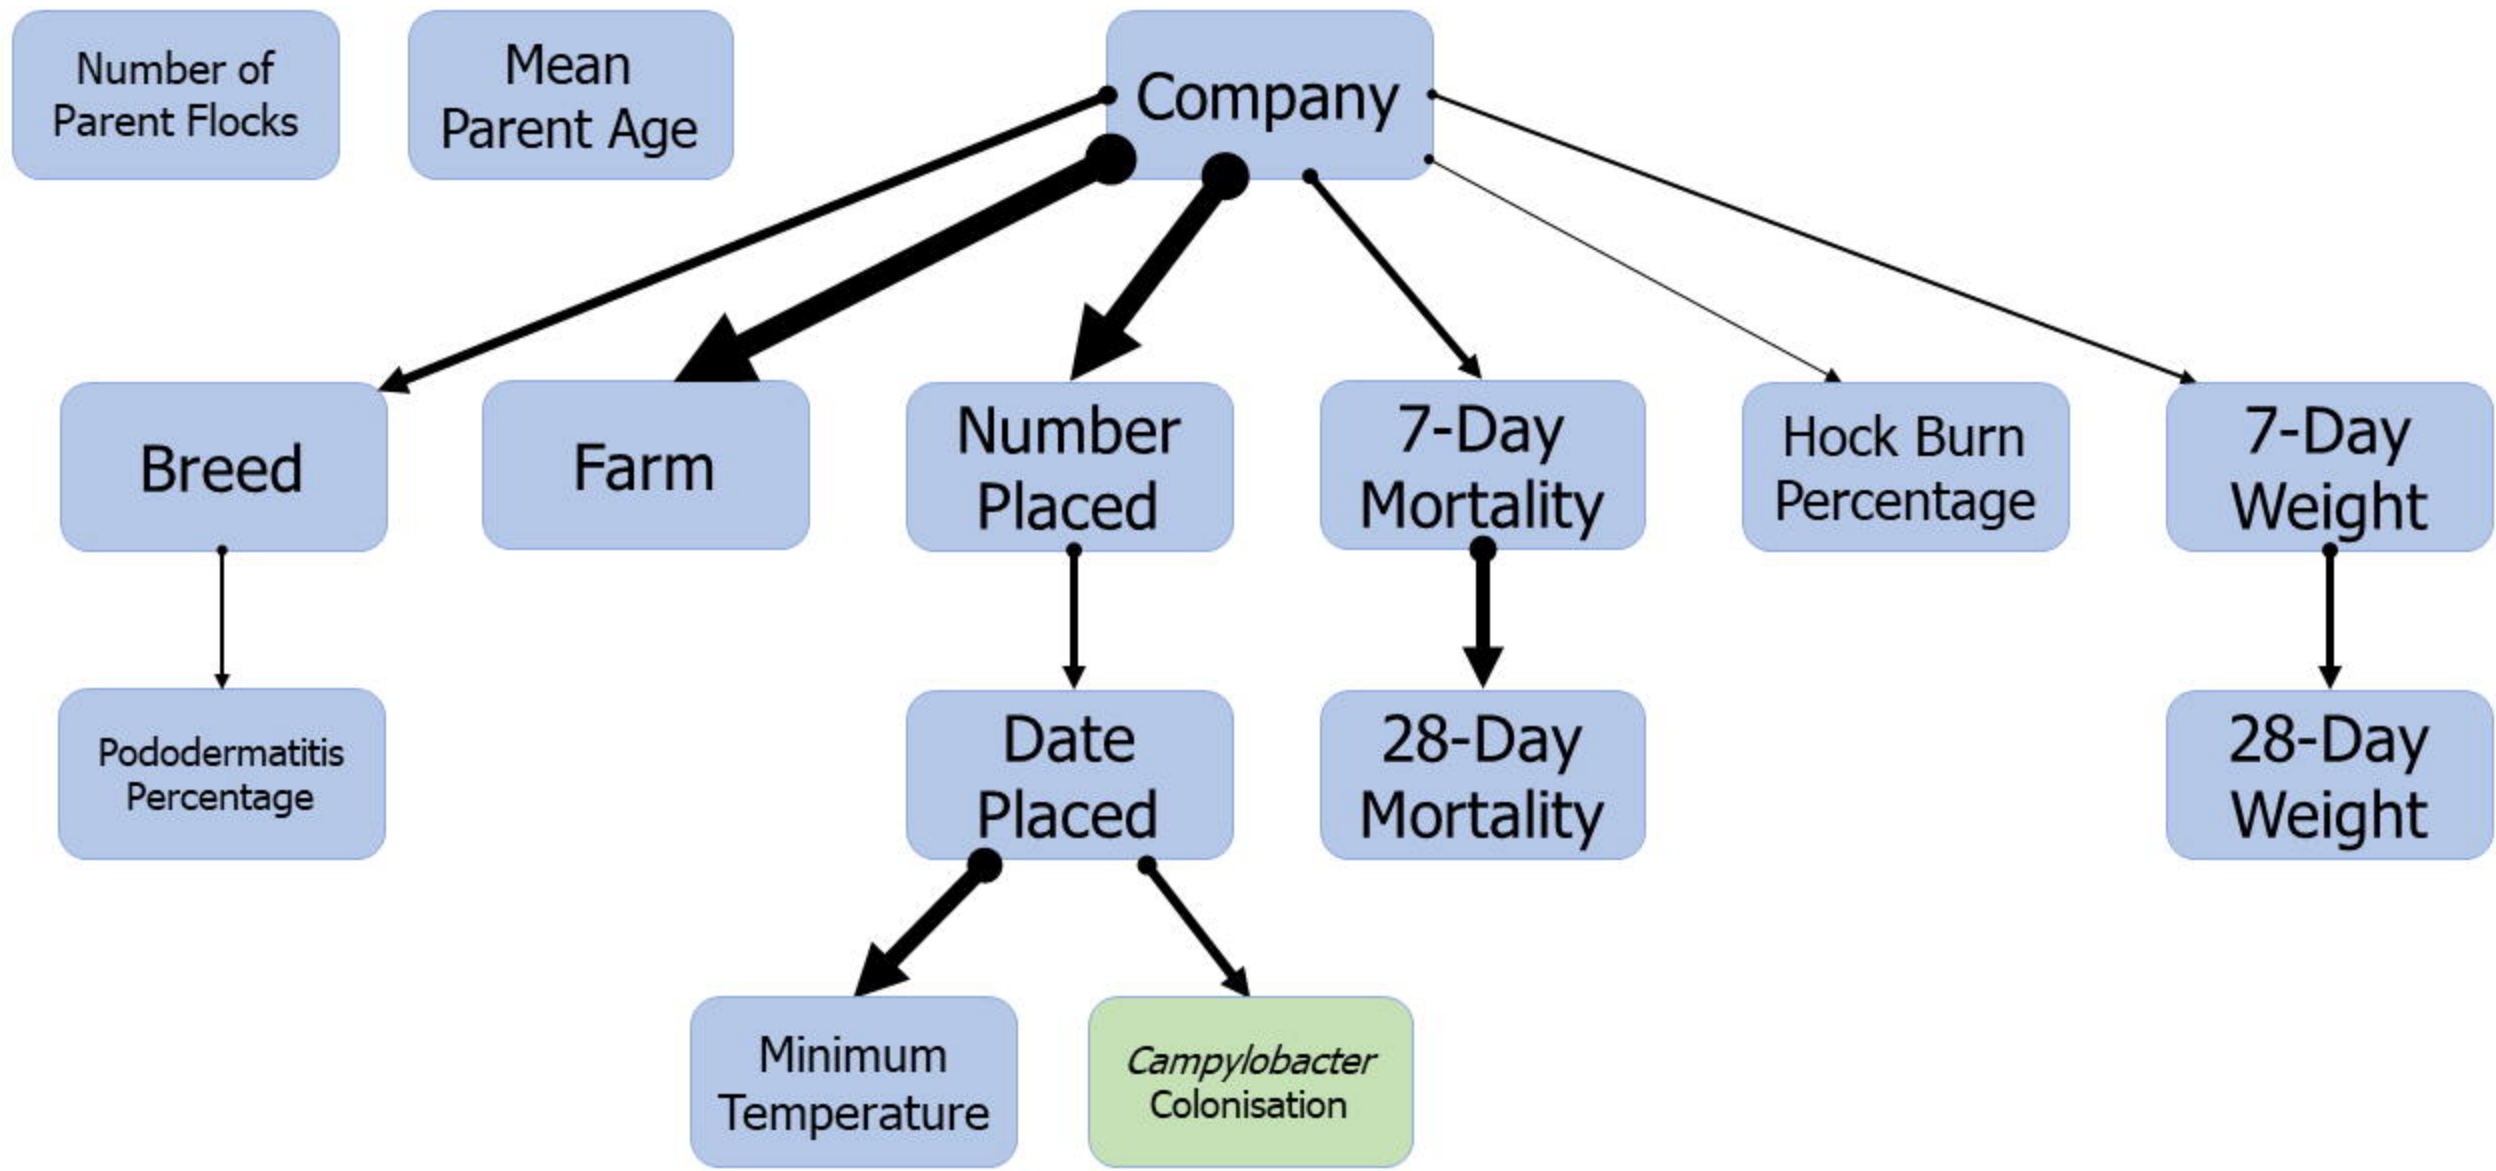

Source: https://biorxiv.org/content/10.1101/2021.03.30.437710v1.full.pdf
